# Supplementary material for: High-throughput quantum theory of atoms in molecules (QTAIM) for geometric deep learning of molecular and reaction properties
Source: Royal Society of Chemistry journal article supplement (doi:10.1039/d4dd00057a), 2024-01-01

Supporting Information for *High-throughput  
Quantum Theory of Atoms in Molecules  
(QTAIM) for Geometric Deep Learning of  
Molecular and Reaction Properties*

Santiago Vargas,<sup>†</sup> Winston Gee,<sup>†</sup> and Anastassia Alexandrova<sup>\*,†,‡,¶</sup>

<sup>†</sup> *Department of Chemistry and Biochemistry, University of California, Los Angeles,  
90095-1569, USA*

<sup>‡</sup> *Department of Materials Science and Engineering, University of California, Los Angeles,  
90095-1569, USA*

<sup>¶</sup> *California NanoSystems Institute*

E-mail: [santiagovargas921@gmail.com](mailto:santiagovargas921@gmail.com), [ana@chem.ucla.edu](mailto:ana@chem.ucla.edu)

## Full set of QTAIM descriptors

| Atom Descriptors                             | Bond Descriptors                             |
|----------------------------------------------|----------------------------------------------|
| Total Electrostatic Potential $\Phi_{tot}$   | Total Electrostatic Potential $\Phi_{tot}$   |
| Nuclear Electrostatic Potential $\Phi_{nuc}$ | Nuclear Electrostatic Potential $\Phi_{nuc}$ |
| Electronic Electrostatic Potential $\Phi_e$  | Electronic Electrostatic Potential $\Phi_e$  |
| Lagrangian ( $\nabla^2\rho$ )                | Lagrangian ( $\nabla^2\rho$ )                |
| Kinetic Energy Hamiltonian                   | Kinetic Energy Hamiltonian                   |
| Gradient Norm                                | Gradient Norm                                |
| $\Delta_g$ promolecular                      | $\Delta_g$ promolecular                      |
| $\Delta_g$ Hirshfield                        | $\Delta_g$ Hirshfield                        |
| Electron Density                             | Electron Density                             |
| Laplacian Electron Density                   | Laplacian Electron Density                   |
| Hessian Determinant                          | Hessian Determinant                          |
| Electron Localization Function(ELF)          | Electron Localization Function(ELF)          |
| Laplacian Norm                               | Laplacian Norm                               |
| Hessian eigenvalue (1st)                     | Hessian eigenvalue (1st)                     |
| Electronic Ellipticity                       | Electronic Ellipticity                       |
| Average Location Ion E                       | Average Location Ion E                       |
| Eta                                          | Eta                                          |
| Localized Orbital Locator                    | Localized Orbital Locator                    |
| energy density                               | energy density                               |
| $\alpha$ spin                                | $\alpha$ spin                                |
| $\beta$ spin                                 | $\beta$ spin                                 |
| spin density                                 | spin density                                 |

# Dataset Visualizations

## Uncorrected Energies - LIBE

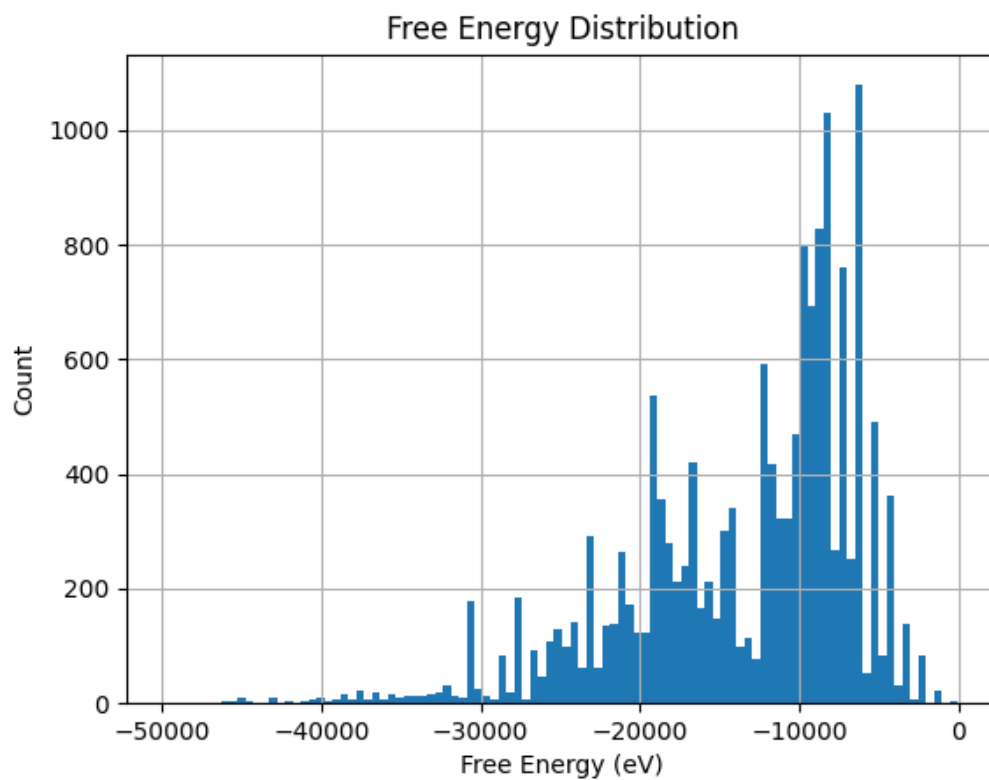

Figure S2: LIBE energies prior to correction

## Corrected Energies - LIBE

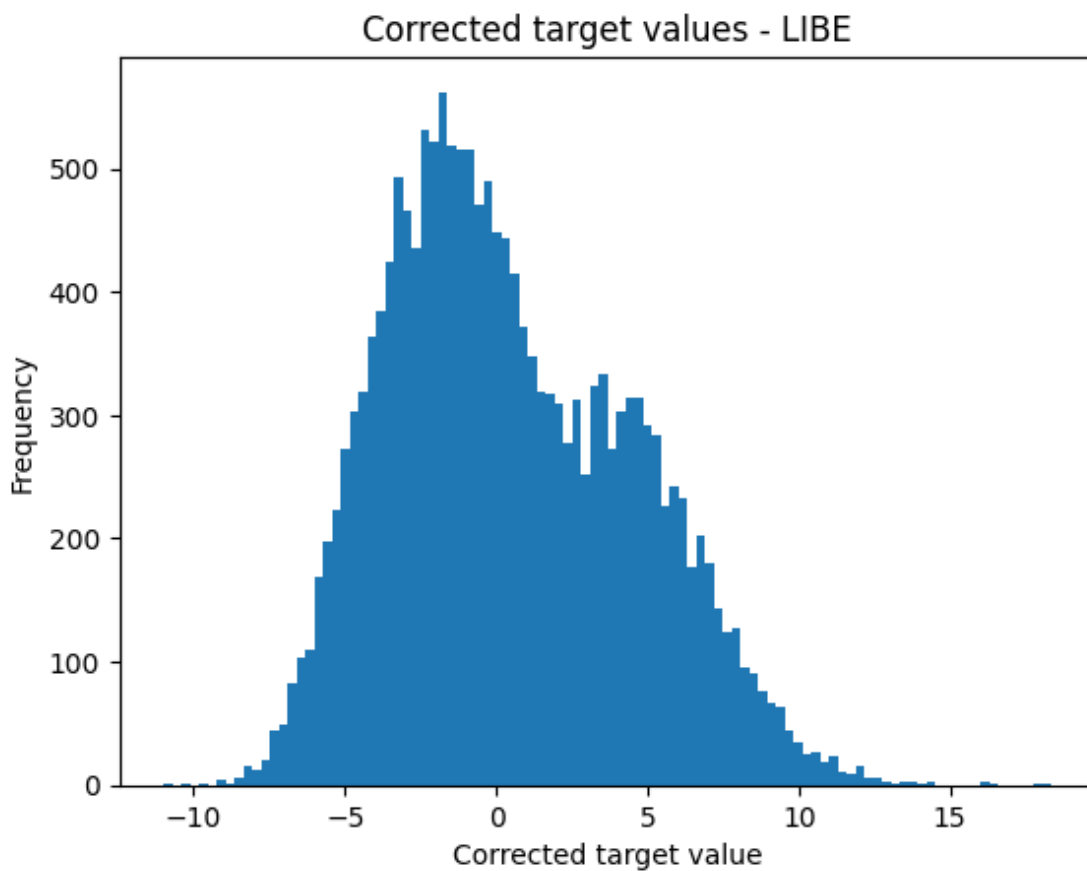

Figure S3: LIBE corrected energies

## Correction Values

Table S4: Correction values used from raw LIBE energies

| Atomic Number | Correction Value |
|---------------|------------------|
| 1             | -16.77537562     |
| 3             | -206.45292515    |
| 6             | -1034.69861041   |
| 7             | -1488.80081496   |
| 8             | -2048.19270236   |
| 9             | -2717.83725543   |
| 15            | -9286.36995521   |
| 16            | -10831.57826394  |

# Parity Plots

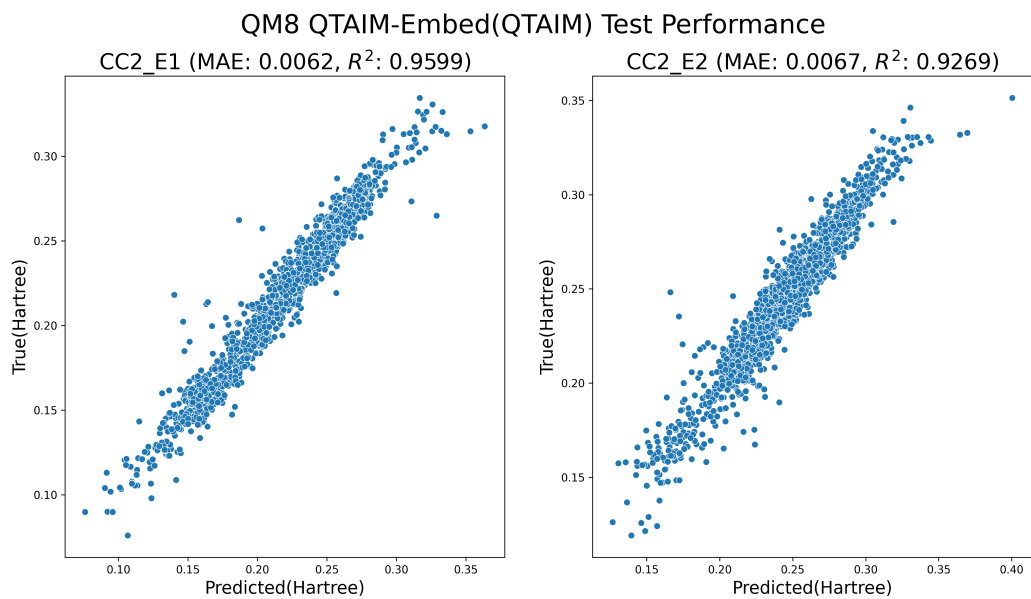

Figure S5: QM8 QTAIM test Parity.

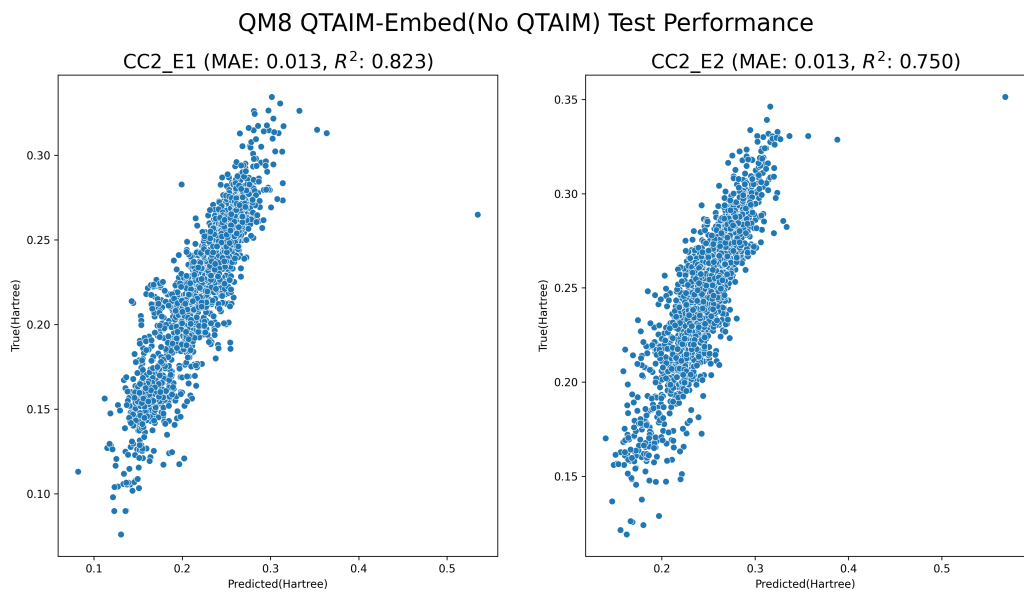

Figure S6: QM8 non-QTAIM test Parity.

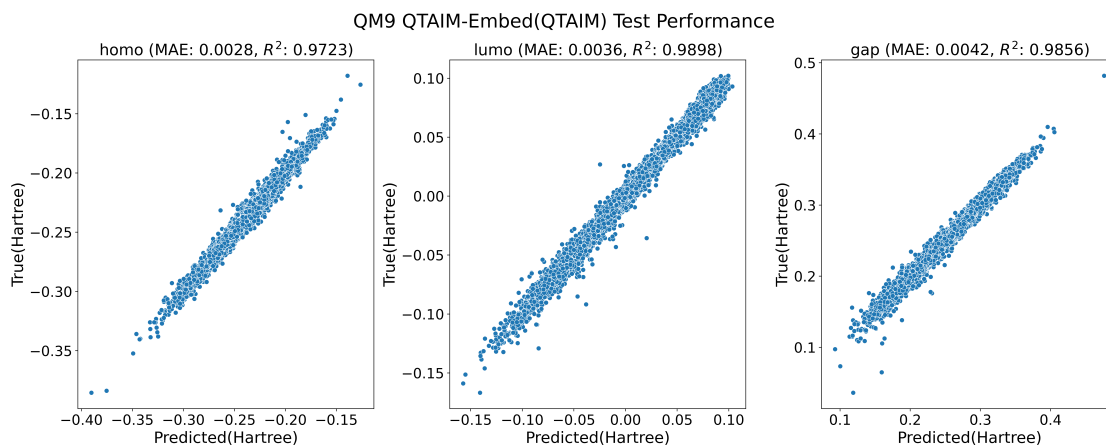

**Figure S7: QM9 QTAIM test Partity.**

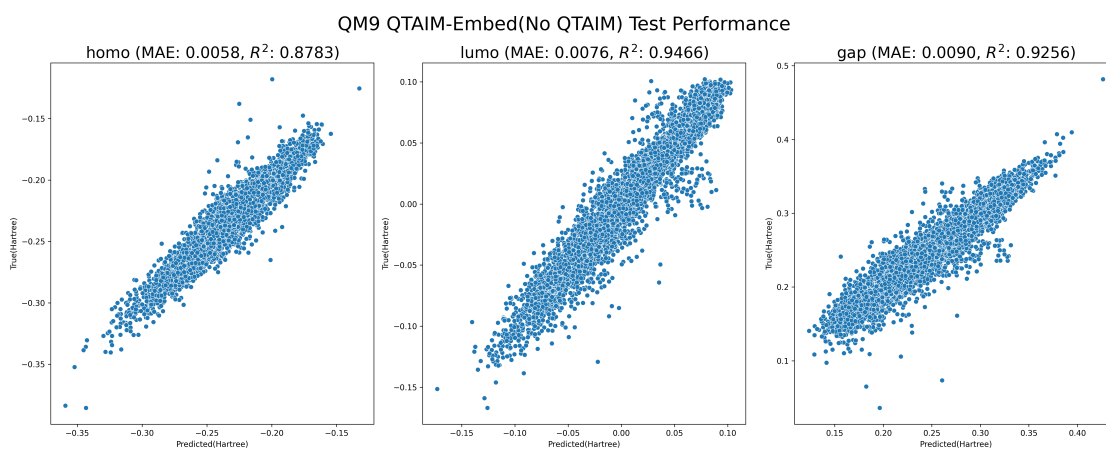

**Figure S8: QM9 non-QTAIM test Partity.**

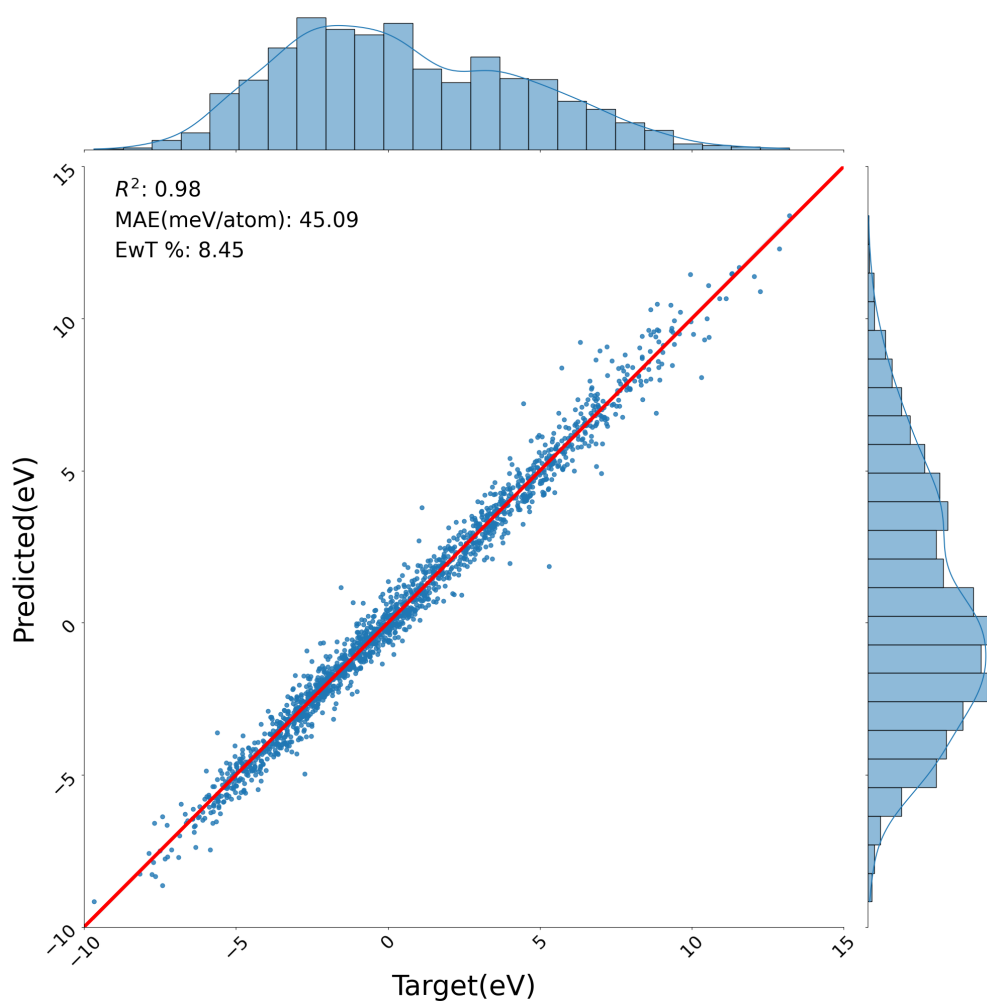

**Figure S9:** LIBE QTAIM test Parity.

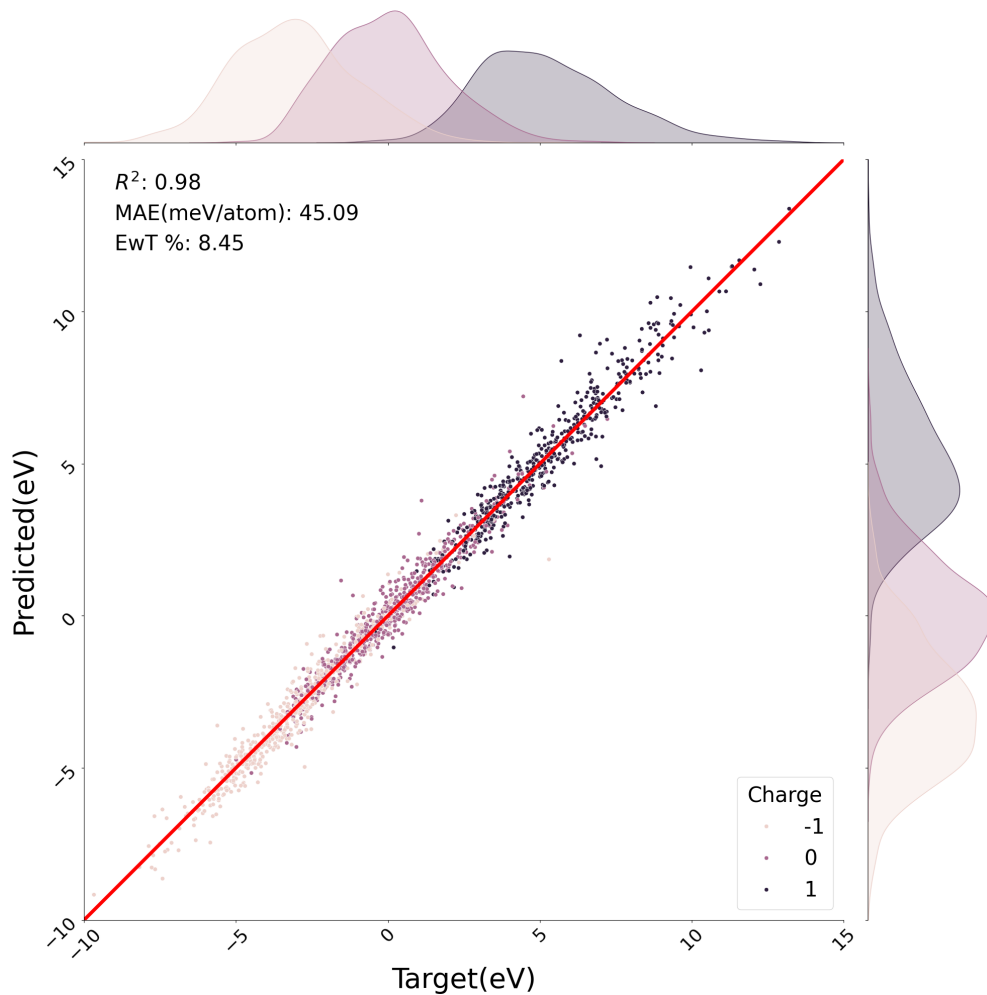

Figure S10: LIBE QTAIM test Parity, charge-partitioned.



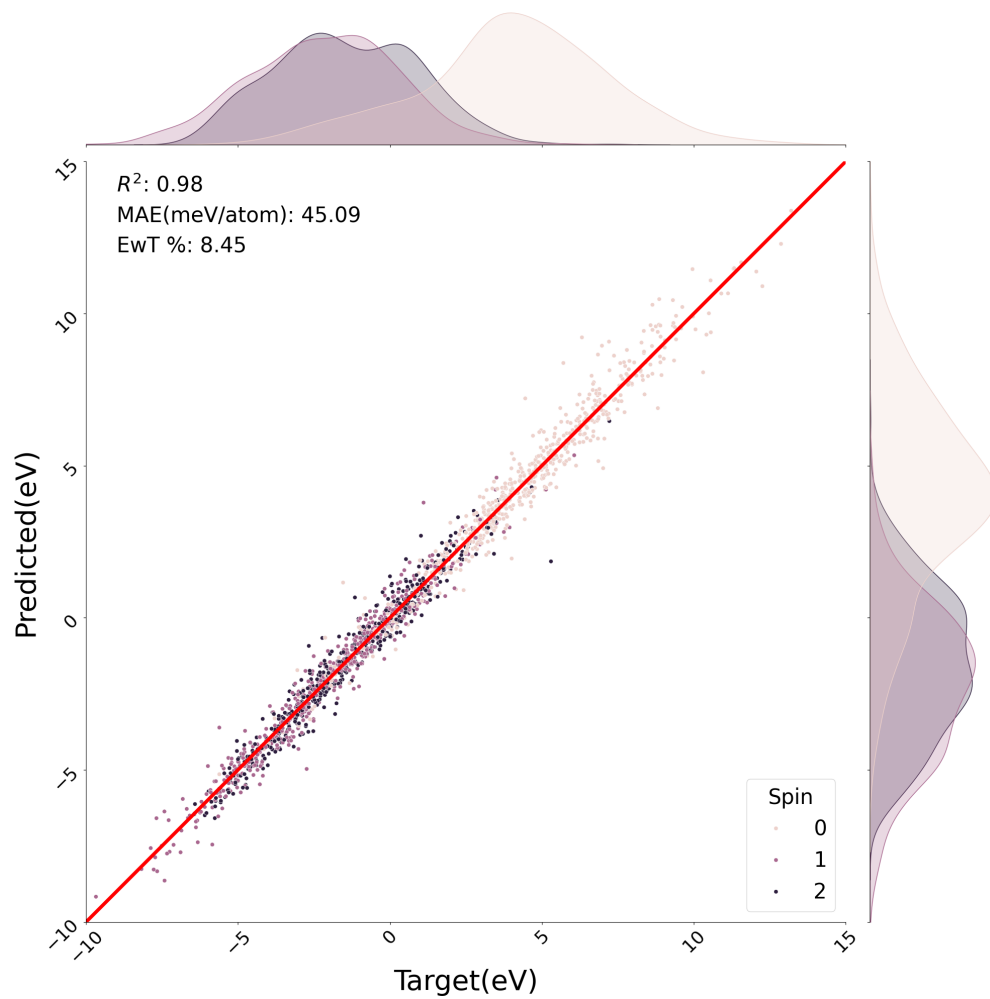

Figure S11: LIBE QTAIM test Parity, spin-partitioned.

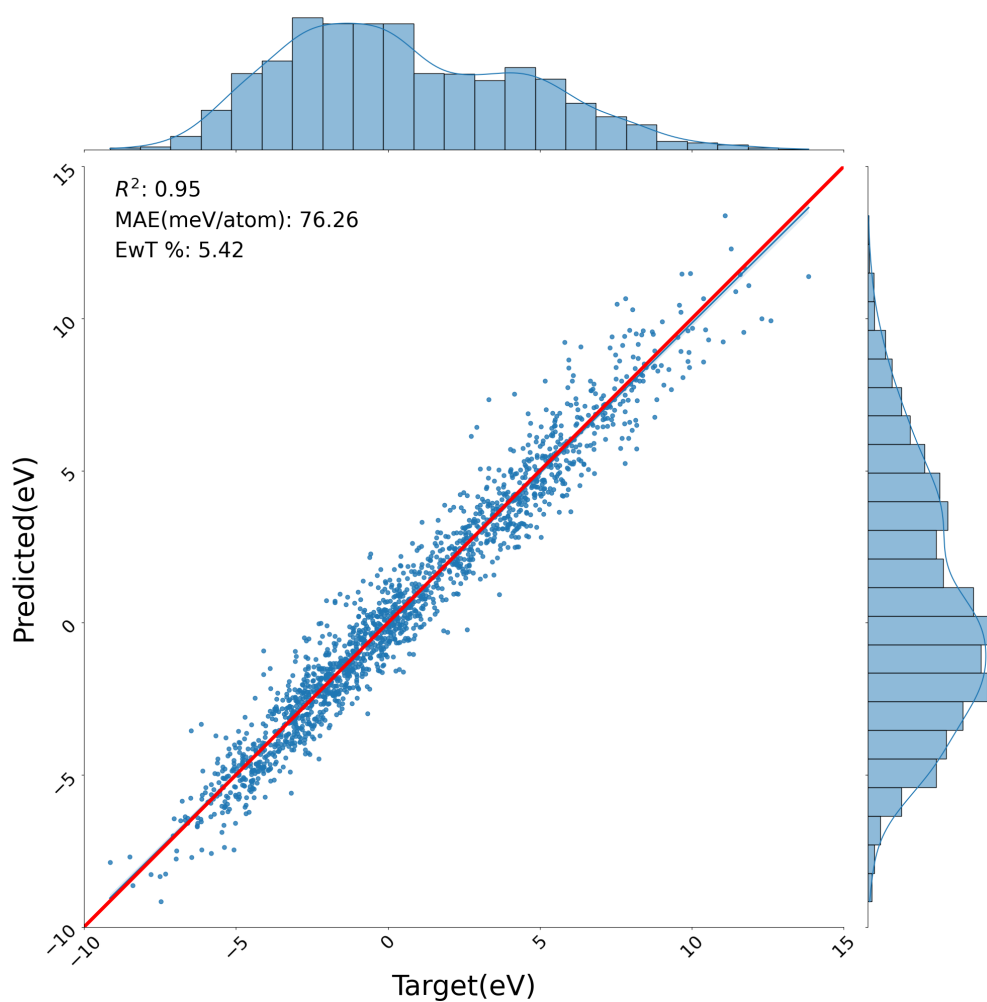

Figure S12: LIBE non-QTAIM test Partity.

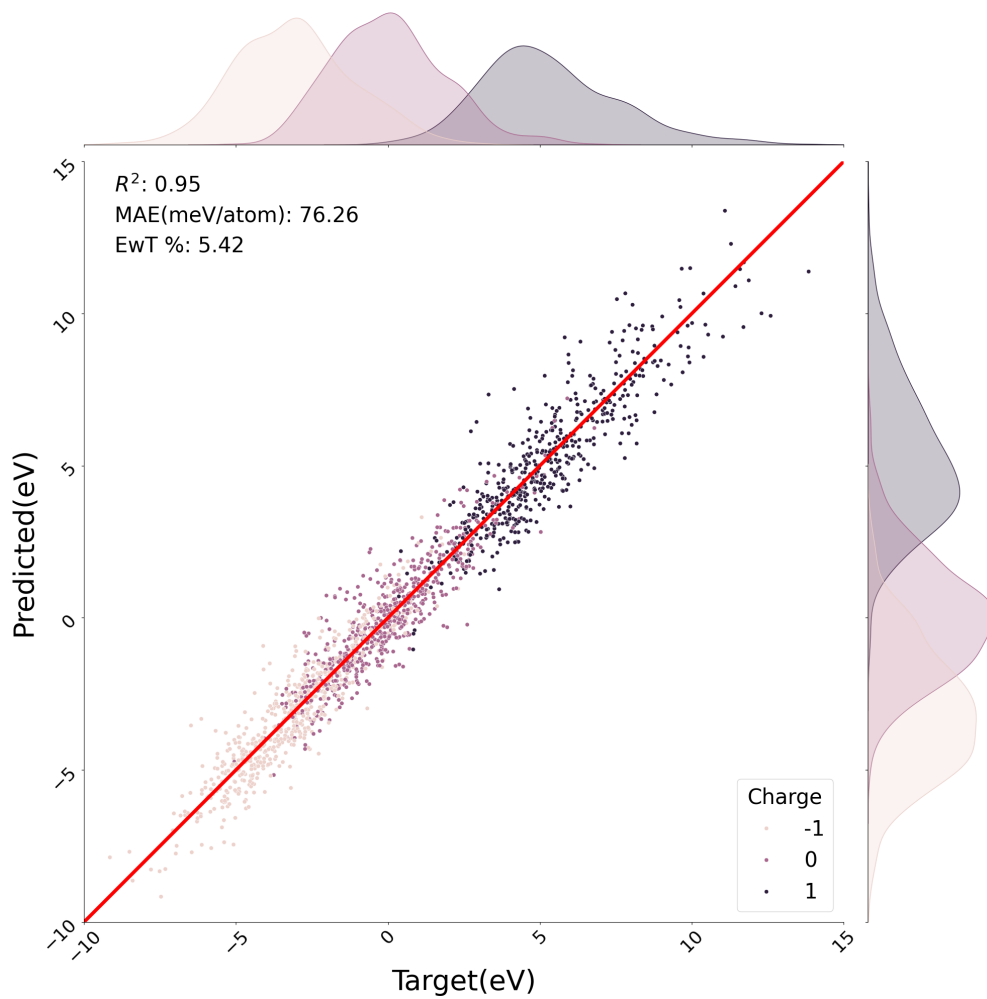

**Figure S13:** LIBE non-QTAIM test Parity, charge-partitioned.

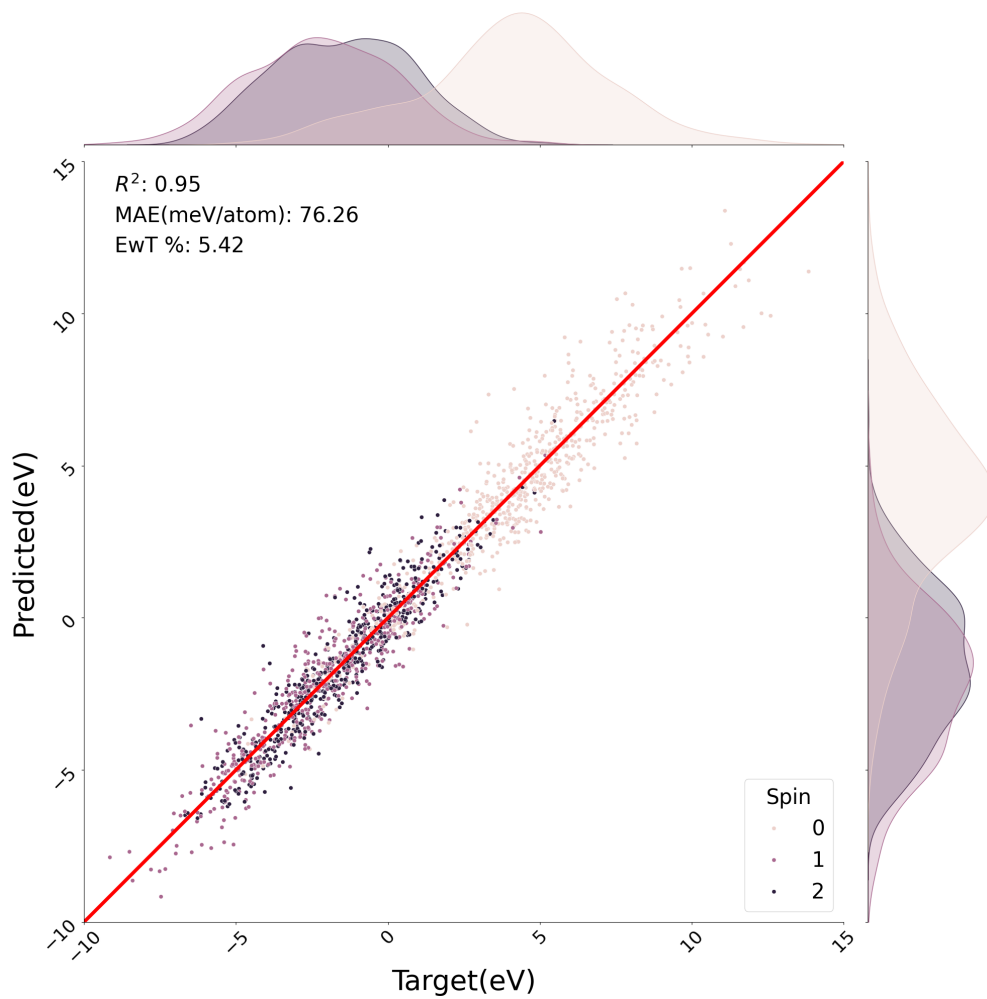

Figure S14: LIBE non-QTAIM test Partity.

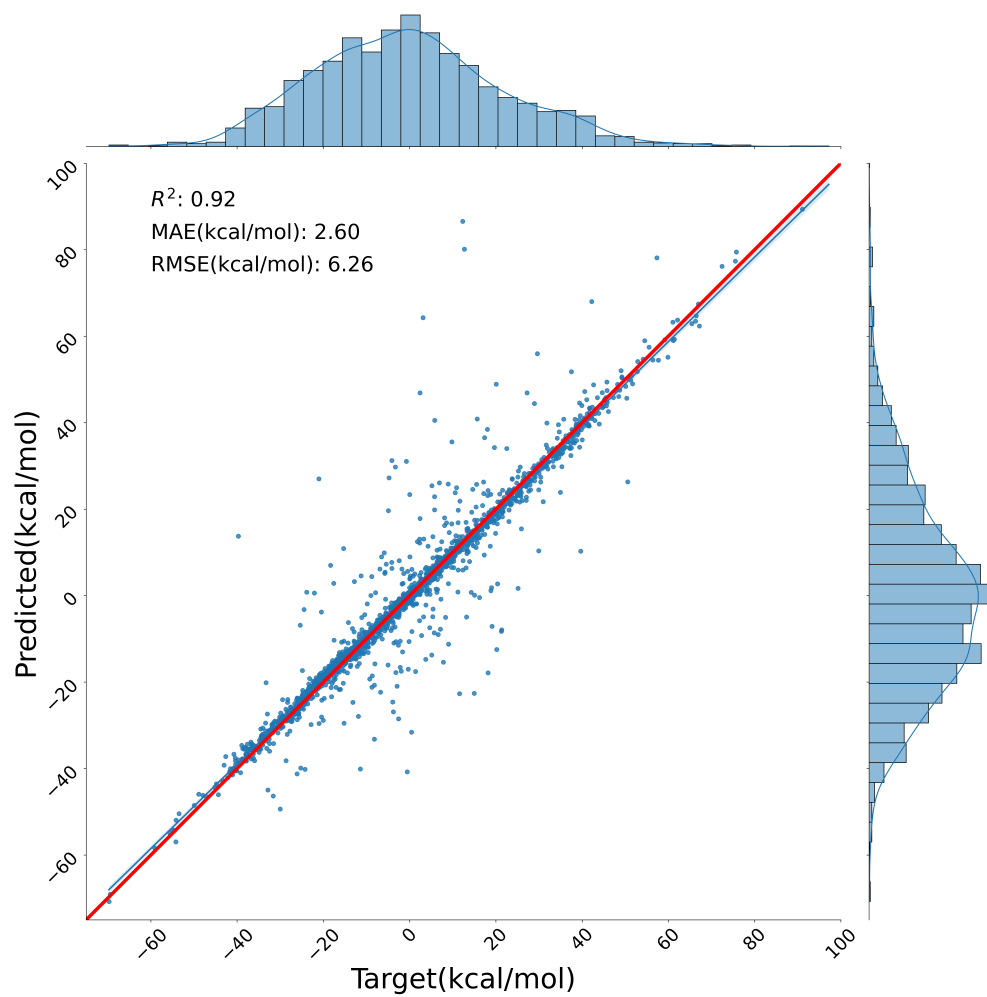

**Figure S15:** Green QTAIM test Partity.

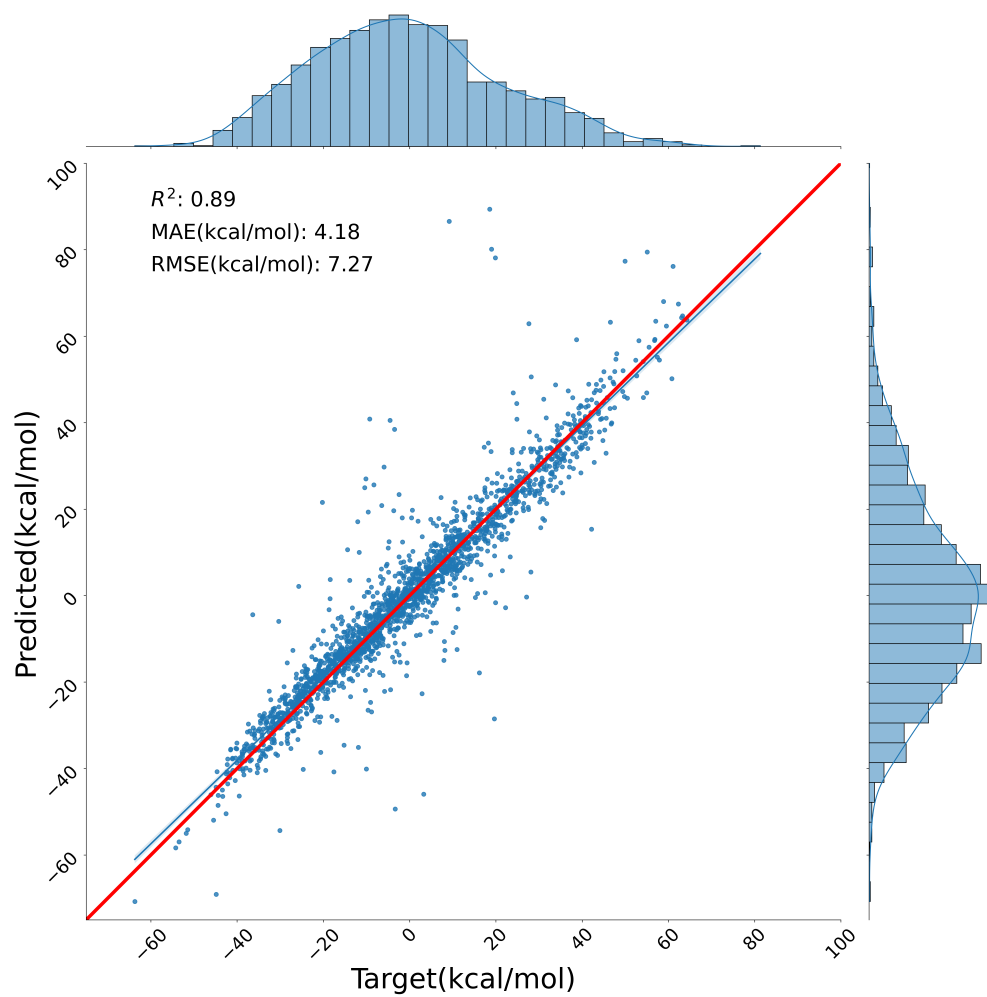

**Figure S16:** Green non-QTAIM test Partity.

# OOD True vs. Predicted Plots

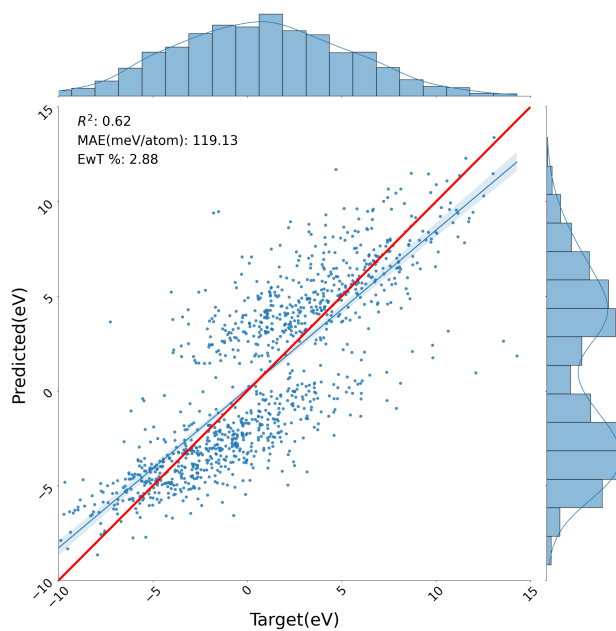

Figure S17: LIBE OOD QTAIM overall test Parity.

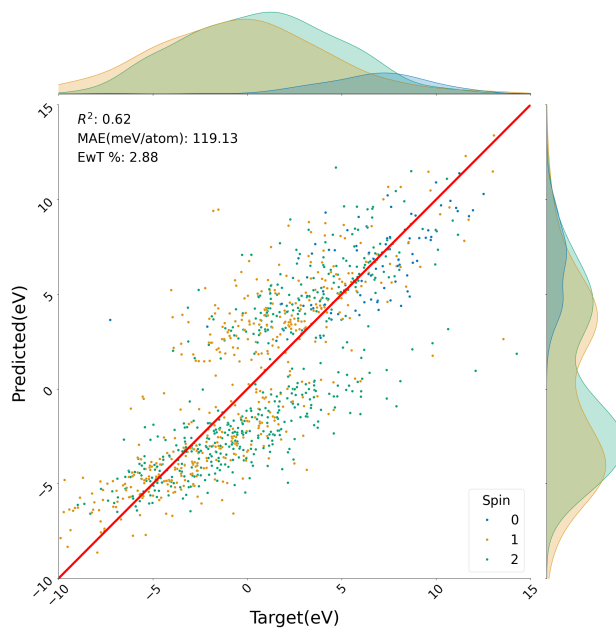

Figure S18: LIBE OOD QTAIM spin-stratified test Parity.

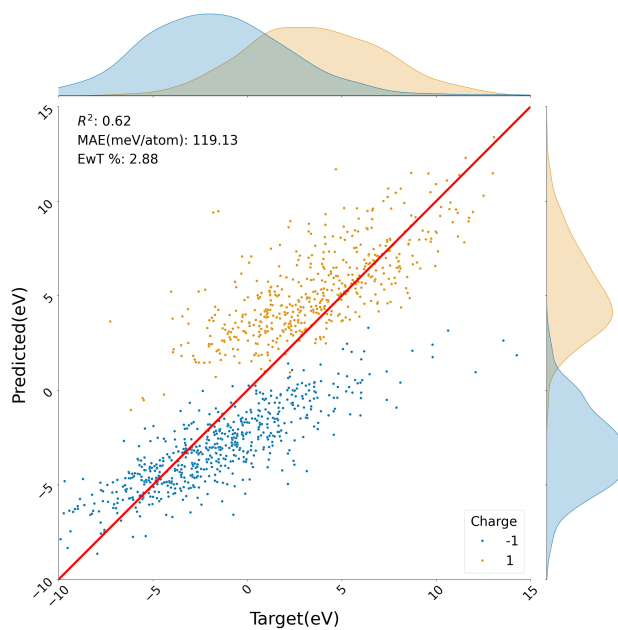

**Figure S19:** LIBE OOD QTAIM charge-stratified test Parity.

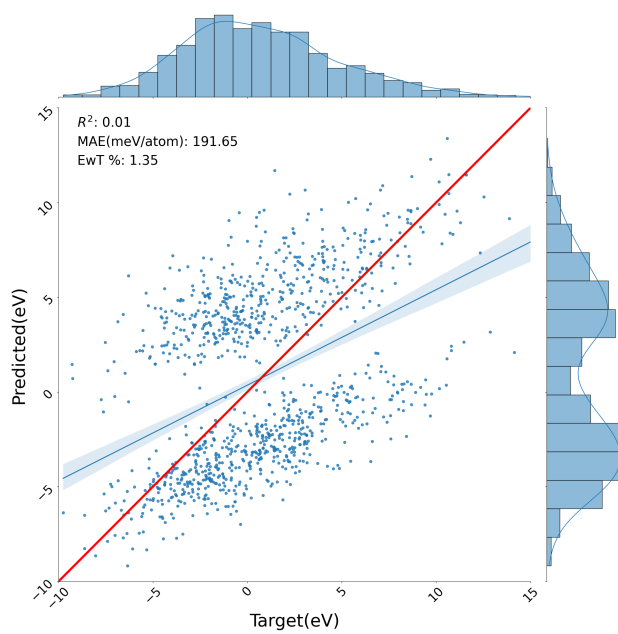

**Figure S20:** LIBE OOD non-QTAIM stratified test Parity.



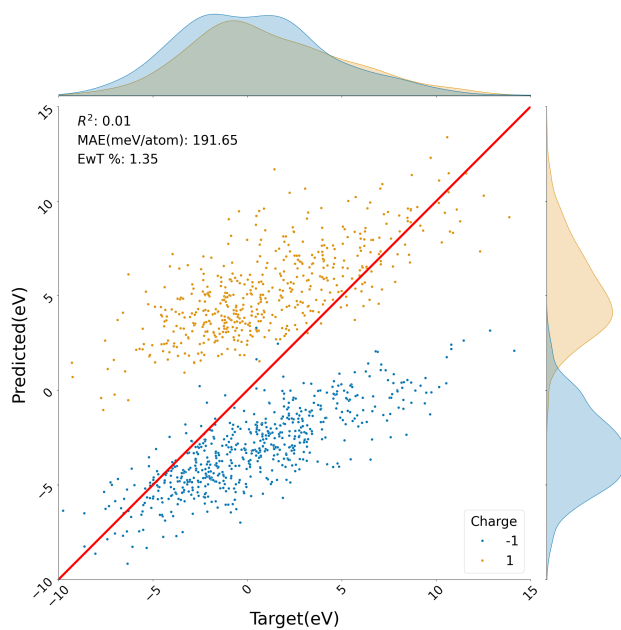

**Figure S21:** LIBE OOD non-QTAIM charge-stratified test Parity.

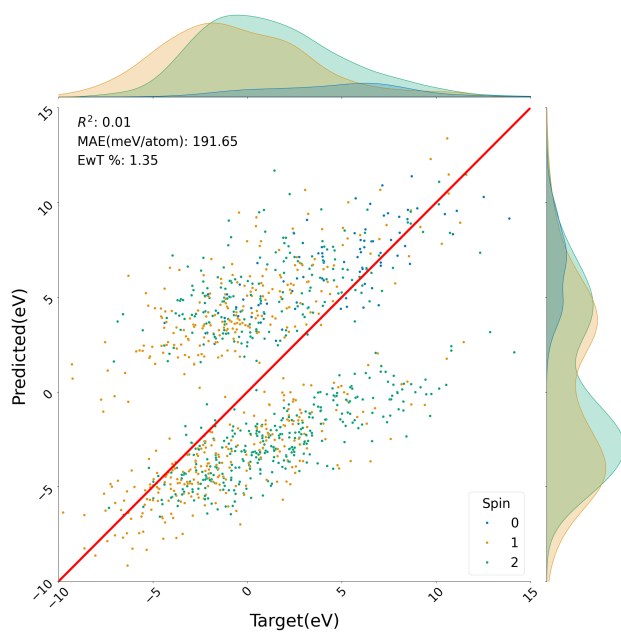

**Figure S22:** LIBE OOD non-QTAIM spin-stratified test Parity.

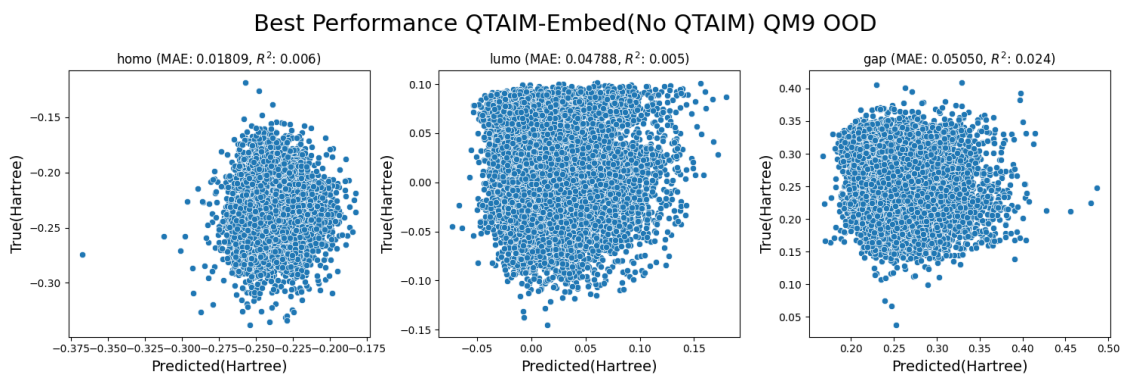

Figure S23: QM9 OOD non-QTAIM test Partity.

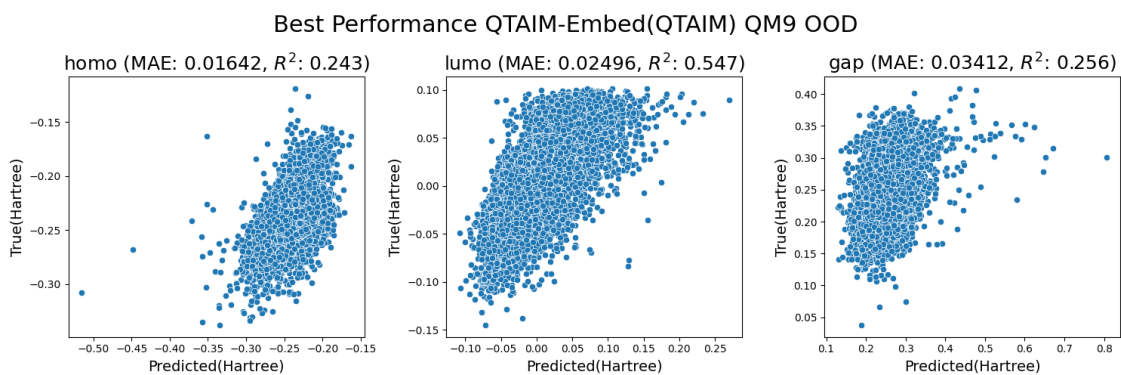

Figure S24: QM9 OOD QTAIM test Partity.

# Tox21 Results

Table S25: Tox21 Test Performance

|                      | Our Model (QTAIM) | Our Model (No QTAIM) |
|----------------------|-------------------|----------------------|
| NR-AR                | <b>0.9722</b>     | 0.9644               |
| NR-AR-LBD            | <b>0.9797</b>     | 0.9734               |
| NR-AhR               | <b>0.8899</b>     | 0.8824               |
| NR-Aromatase         | <b>0.9584</b>     | 0.9502               |
| NR-ER                | <b>0.8988</b>     | 0.8942               |
| NR-ER-LBD            | <b>0.9613</b>     | 0.9567               |
| NR-PPAR-gamma        | 0.9779            | <b>0.9786</b>        |
| SR-ARE               | <b>0.8567</b>     | 0.8413               |
| SR-ATAD5             | <b>0.9775</b>     | 0.9748               |
| SR-HSE               | <b>0.9506</b>     | 0.9467               |
| SR-MMP               | <b>0.8552</b>     | 0.8405               |
| SR-p53               | <b>0.9477</b>     | 0.9458               |
| <b>Average AUROC</b> | <b>0.9355</b>     | 0.9291               |

## Full Learning Curves

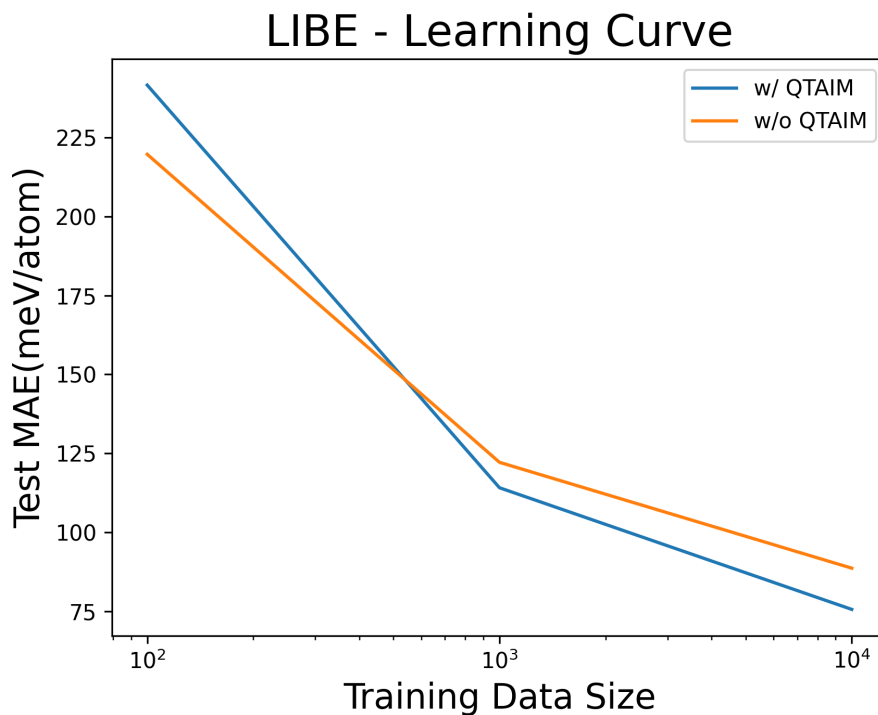

Figure S26: LIBE Learning Curve on MAE

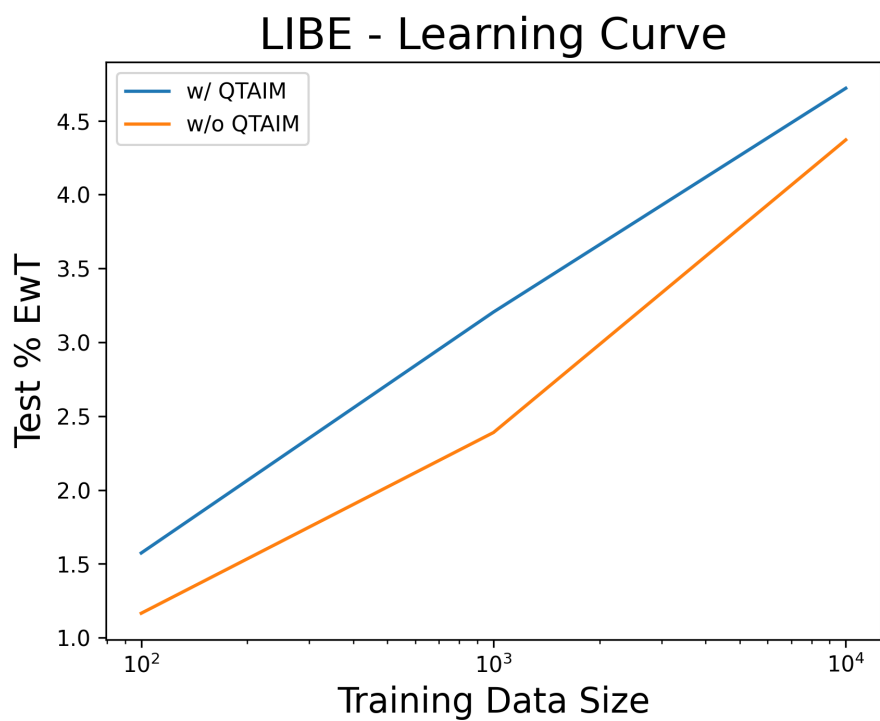

Figure S27: LIBE Learning Curve on %EwT

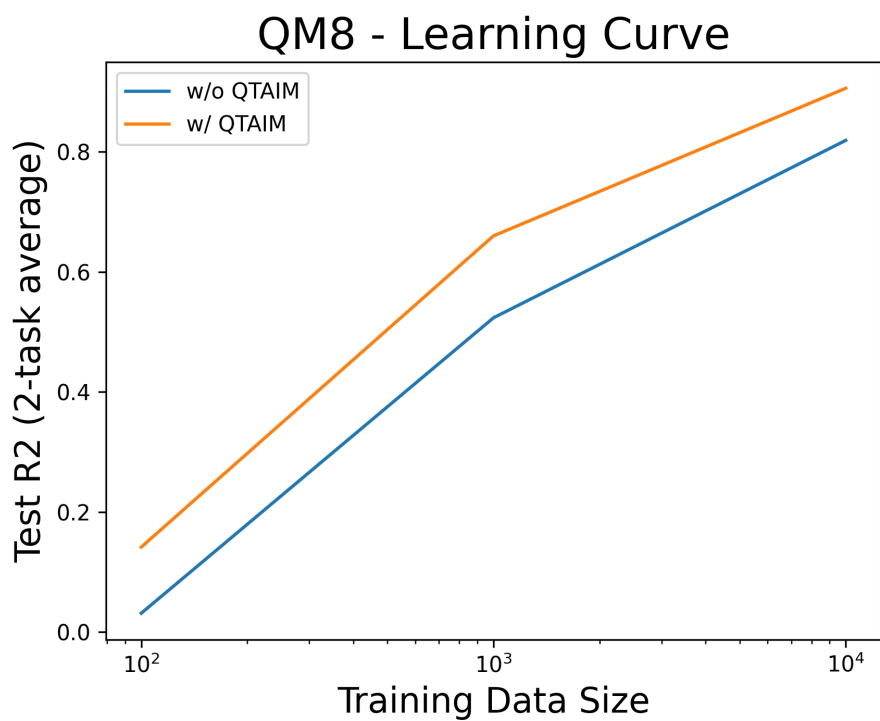

Figure S28: QM8 Learning Curve on  $R^2$

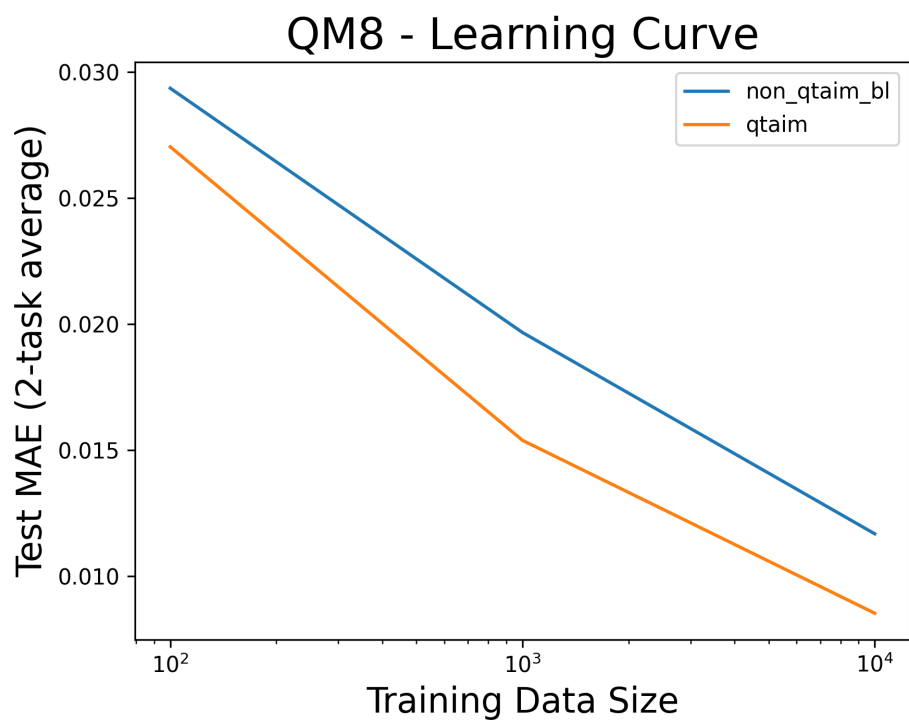

Figure S29: QM8 Learning Curve on MAE

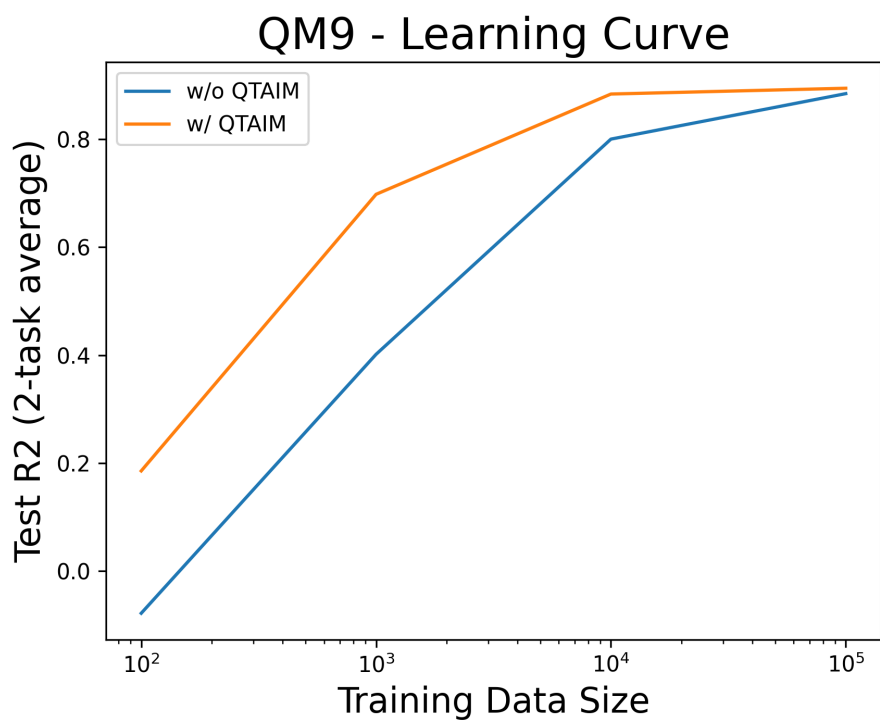

Figure S30: QM9 Learning Curve on  $R^2$

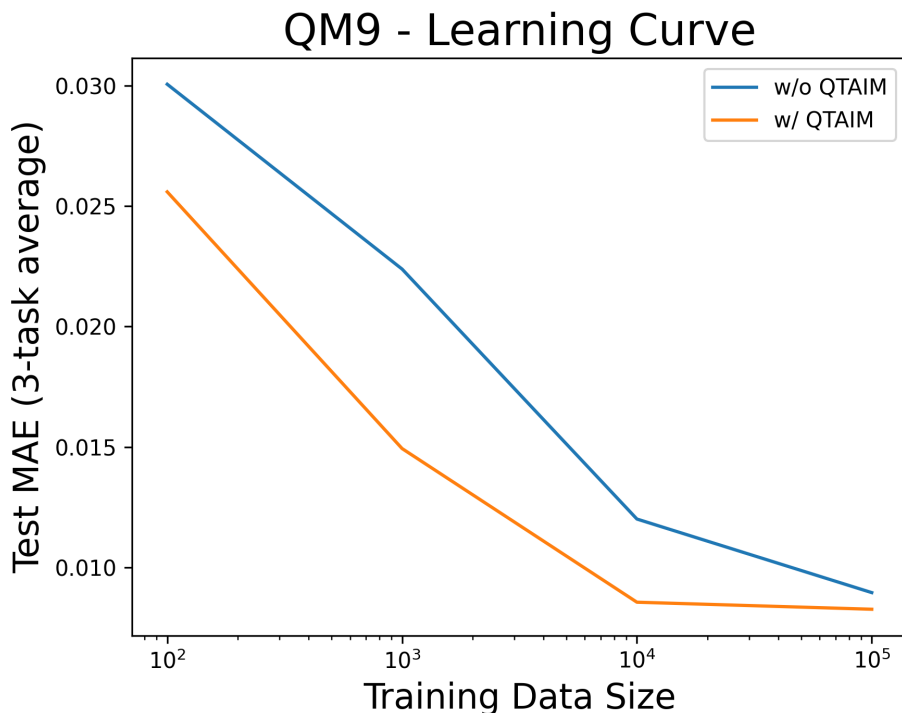

Figure S31: QM9 Learning Curve on MAE

## Hyperparameter Selection

For ChemProp hyperparameter optimizations we used their inbuilt hyperopt functionality.<sup>1</sup>

Here we used the following set of parameters as sweep values:

Schnet/PaiNN - Here we used their default values<sup>2,3</sup> a select set of values:

Table S32: Hyperparameters Swept for SchNet and PaiNN

| Hyperparameter     | Values Swept        |
|--------------------|---------------------|
| N_atom_basis       | 10, 20, 50          |
| Shared interaction | T F                 |
| LR                 | 0.01, 0.001, 0.0001 |

QTAIM-embed - for our own in-house algorithms, we leveraged Wandb’s parameter selection tool.<sup>4</sup> We used the same hyperparameter sweep configs for each model set. Finalized trained models for LIBE used the complete set of QTAIM descriptors above, other models removed  $\alpha$  and  $\beta$  spin descriptors.

**Table S33:** QTAIM-embed (our) model hyperparameter sweeps

| <b>Hyperparameter</b>    | <b>Values Swept</b> |
|--------------------------|---------------------|
| weight_decay             | 0.0, 0.00001        |
| Embedding_size           | 16, 20, 24          |
| Gated_dropout            | 0.0, 0.1, 0.2       |
| Gated_hidden_size        | 64, 128             |
| Gated_batch_norm         | T, f                |
| Gated_graph_norm         | T, f                |
| Num_lstm_iters           | 9, 11, 13, 15       |
| Num_lstm_layers          | 1, 2                |
| Fc_dropout               | 0.1, 0.2            |
| Fc_hidden_size_1         | 256, 128            |
| Fc_hidden_shape          | flat, cone          |
| Precision                | bf16, 32            |
| Gradient_clip_val        | 10, 100             |
| Accumulated_grad_batches | 1, 3, 5             |

# Dataset QTAIM distributions

QM8

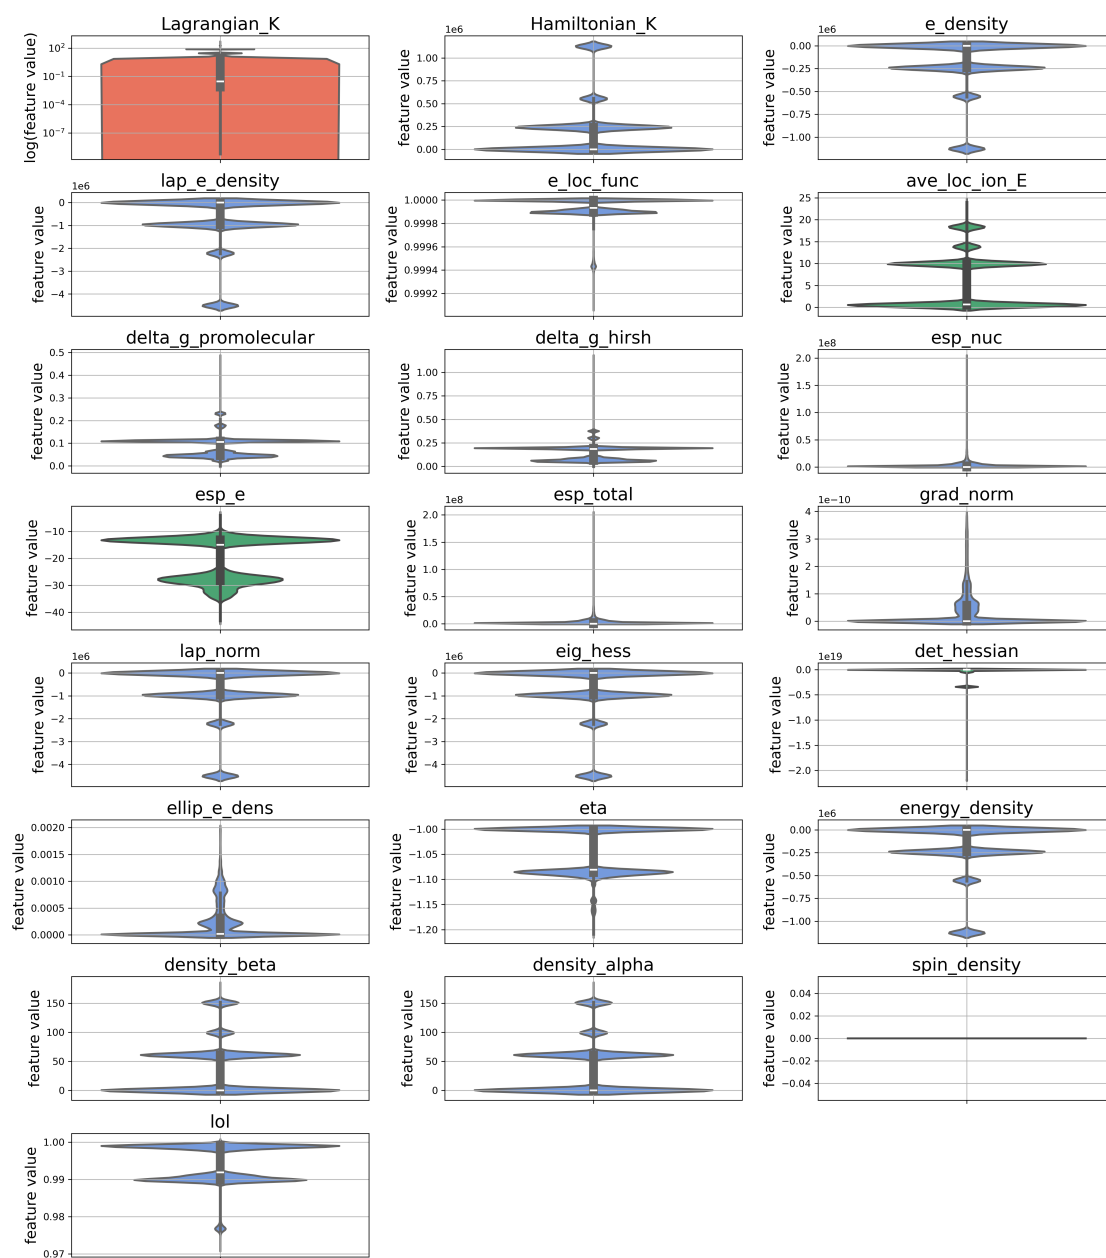

Figure S34: QM8 QTAIM value distribution - NCPs



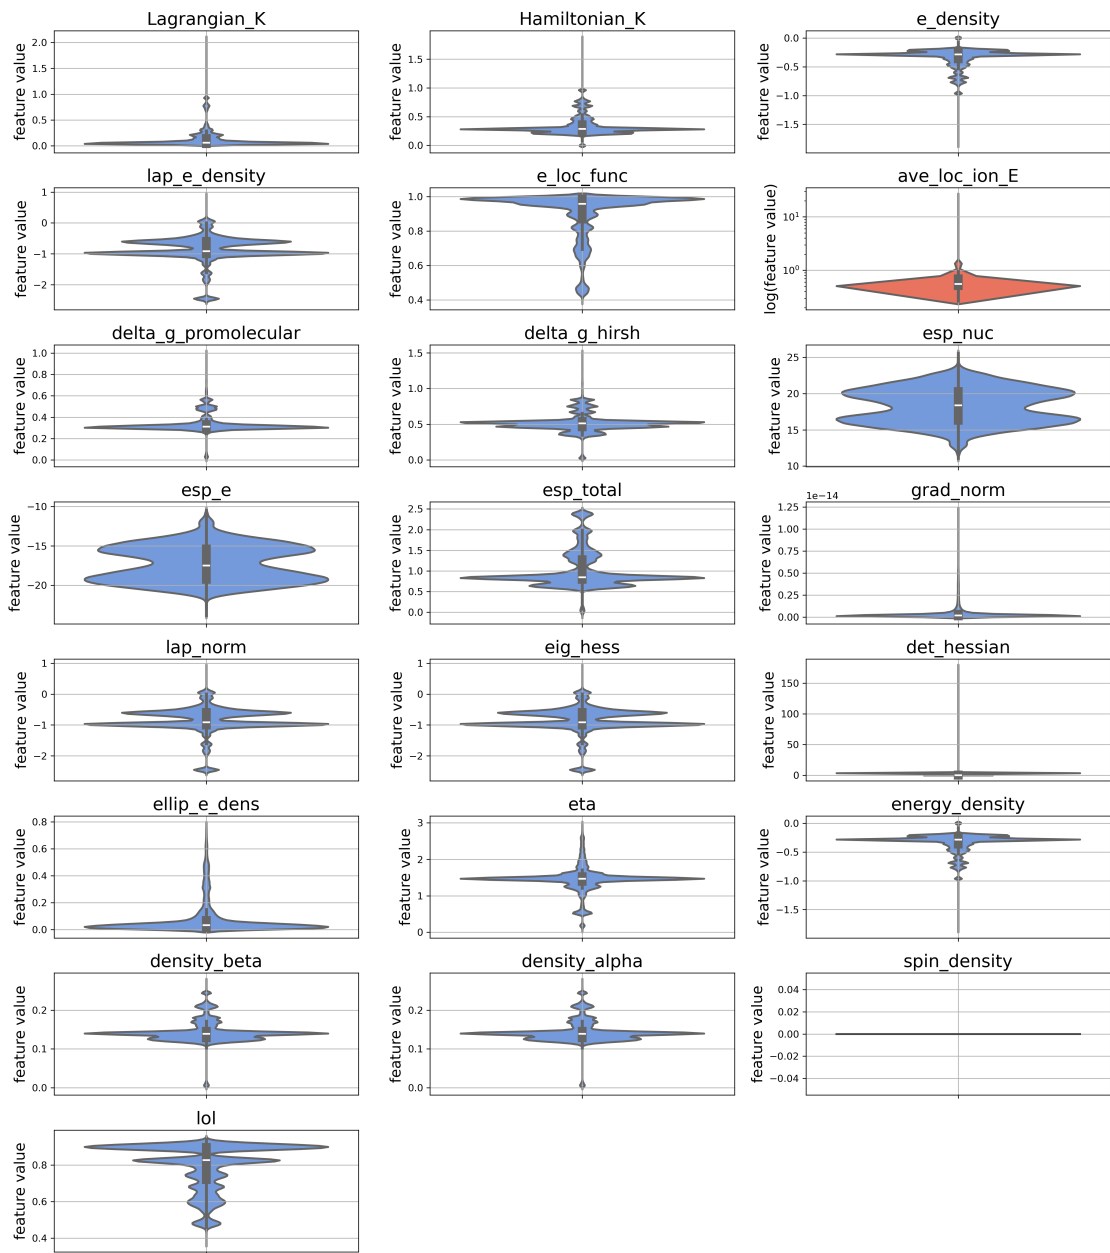

Figure S35: QM8 QTAIM value distribution - BCPs

# QM9

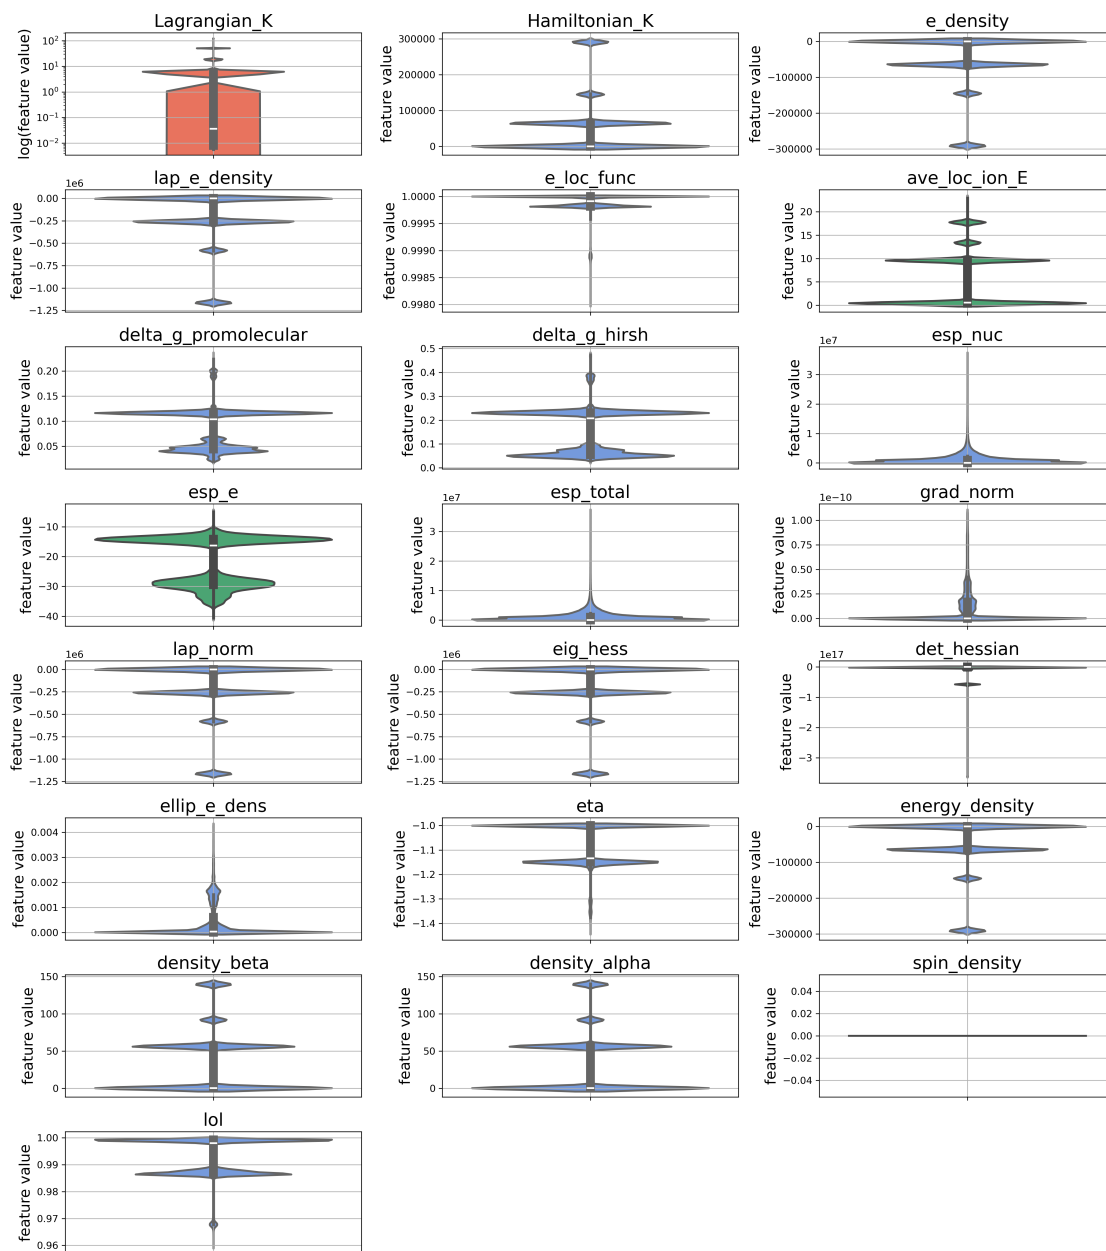

Figure S36: QM9 QTAIM value distribution - NCPs

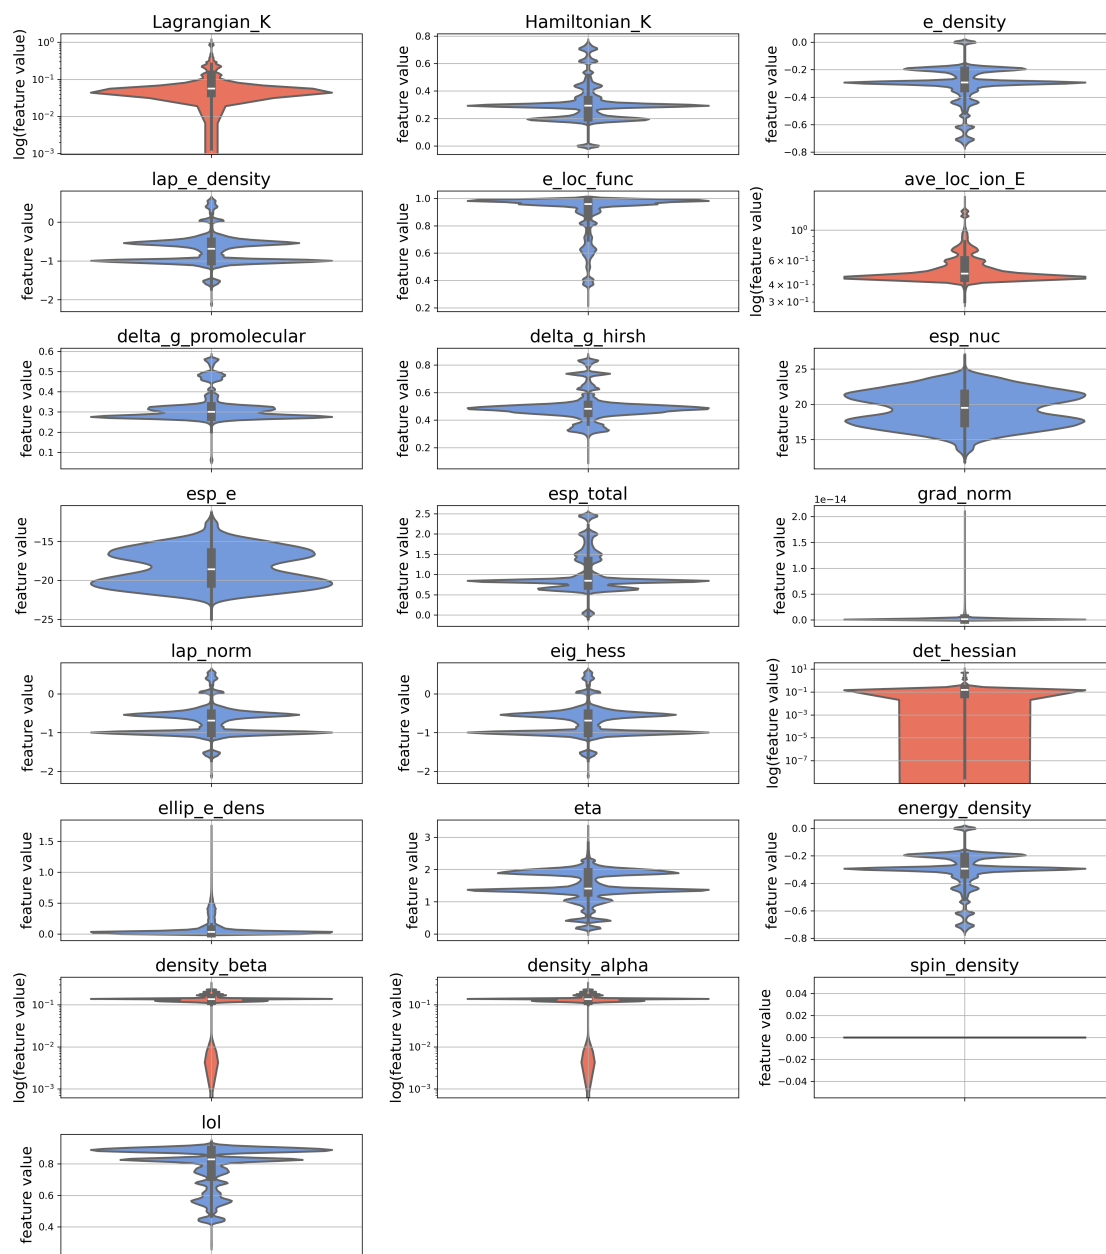

Figure S37: QM9 QTAIM value distribution - BCPs

# LIBE

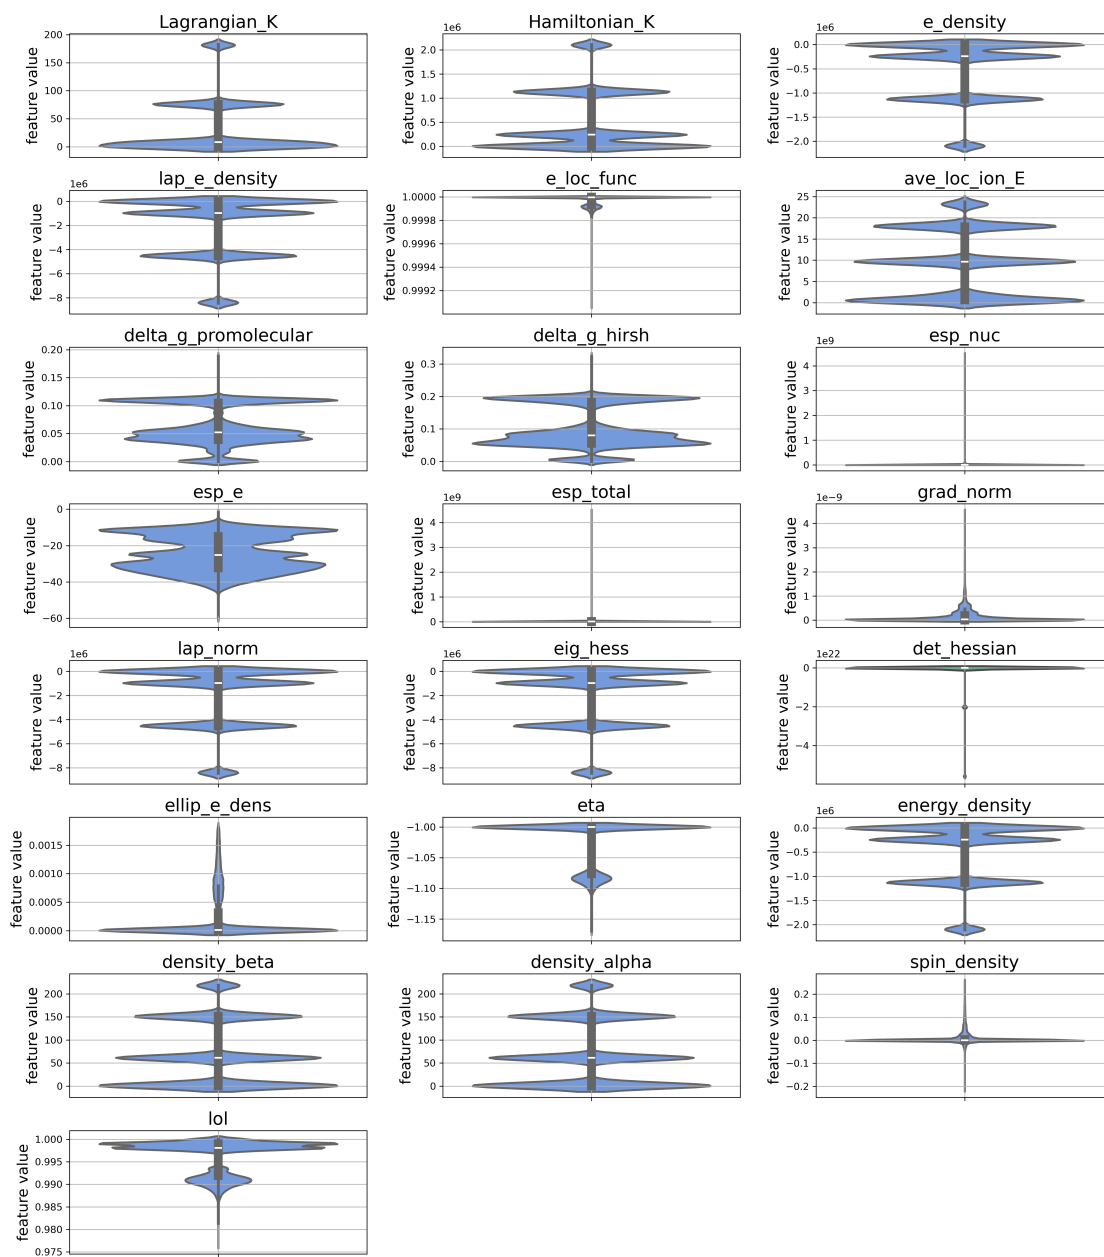

Figure S38: LIBE QTAIM value distribution - BCPs

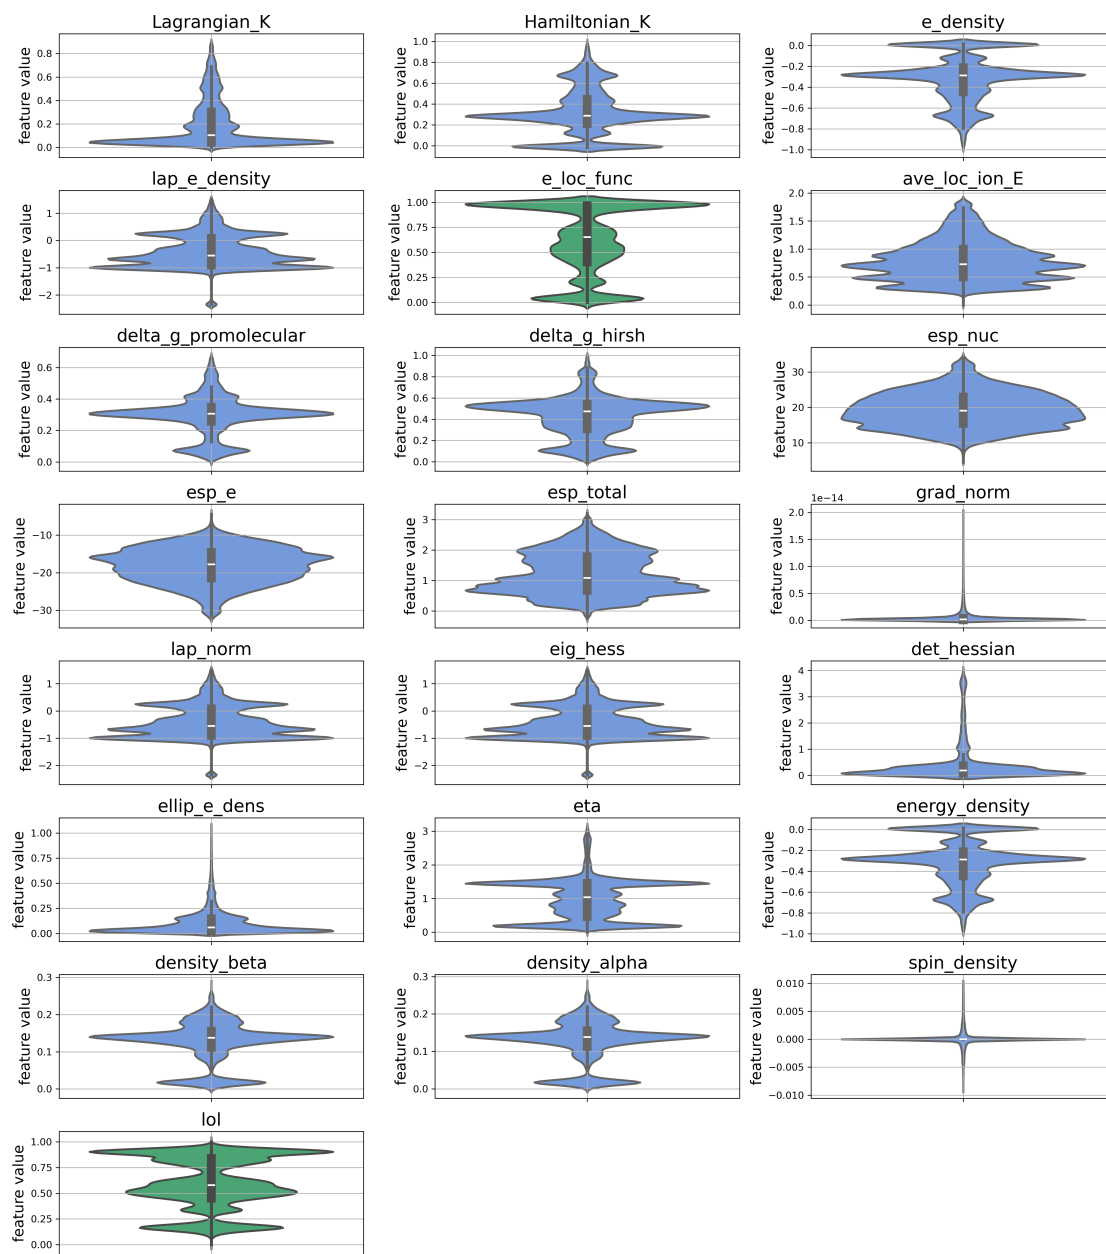

Figure S39: LIBE QTAIM value distribution - BCPs

# Tox21

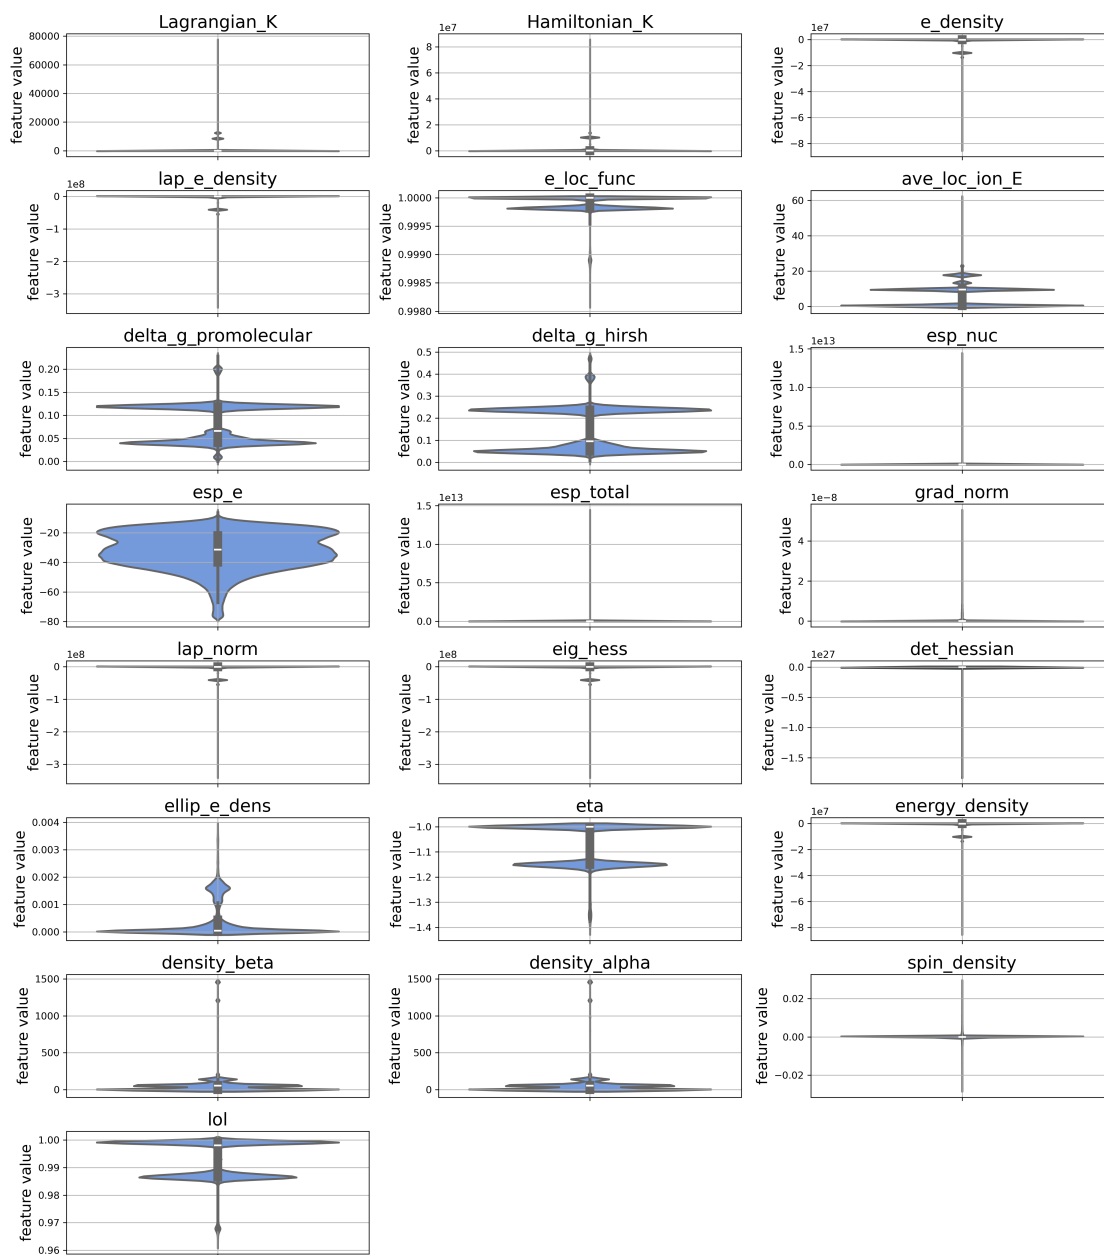

Figure S40: Tox21 QTAIM value distribution - BCPs

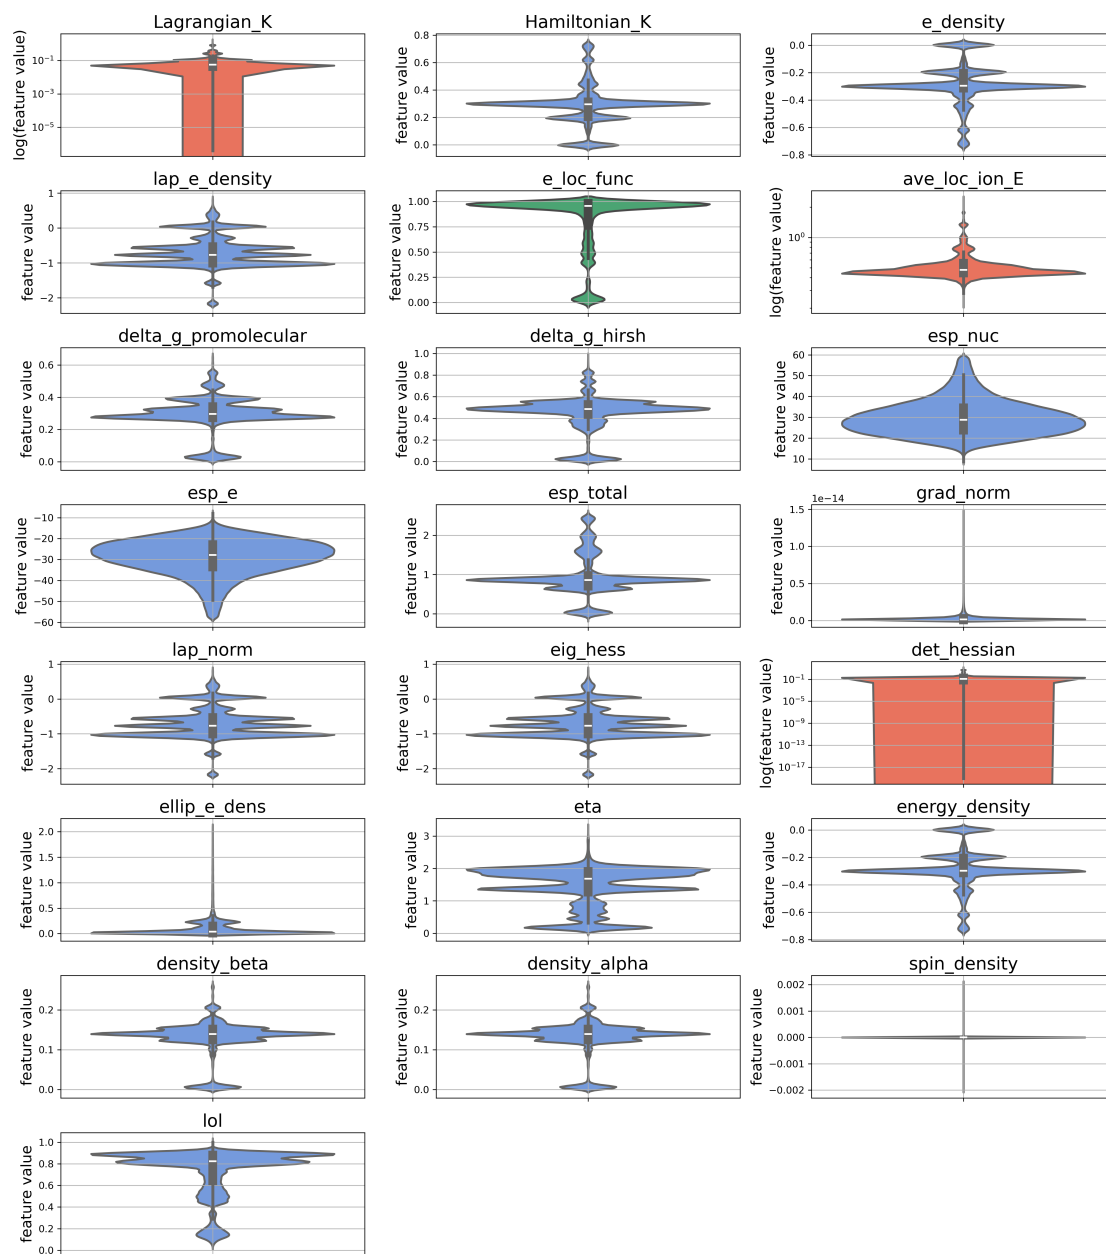

Figure S41: Tox21 QTAIM value distribution - BCPs

# Correlation of QTAIM Values to Targets

QM8

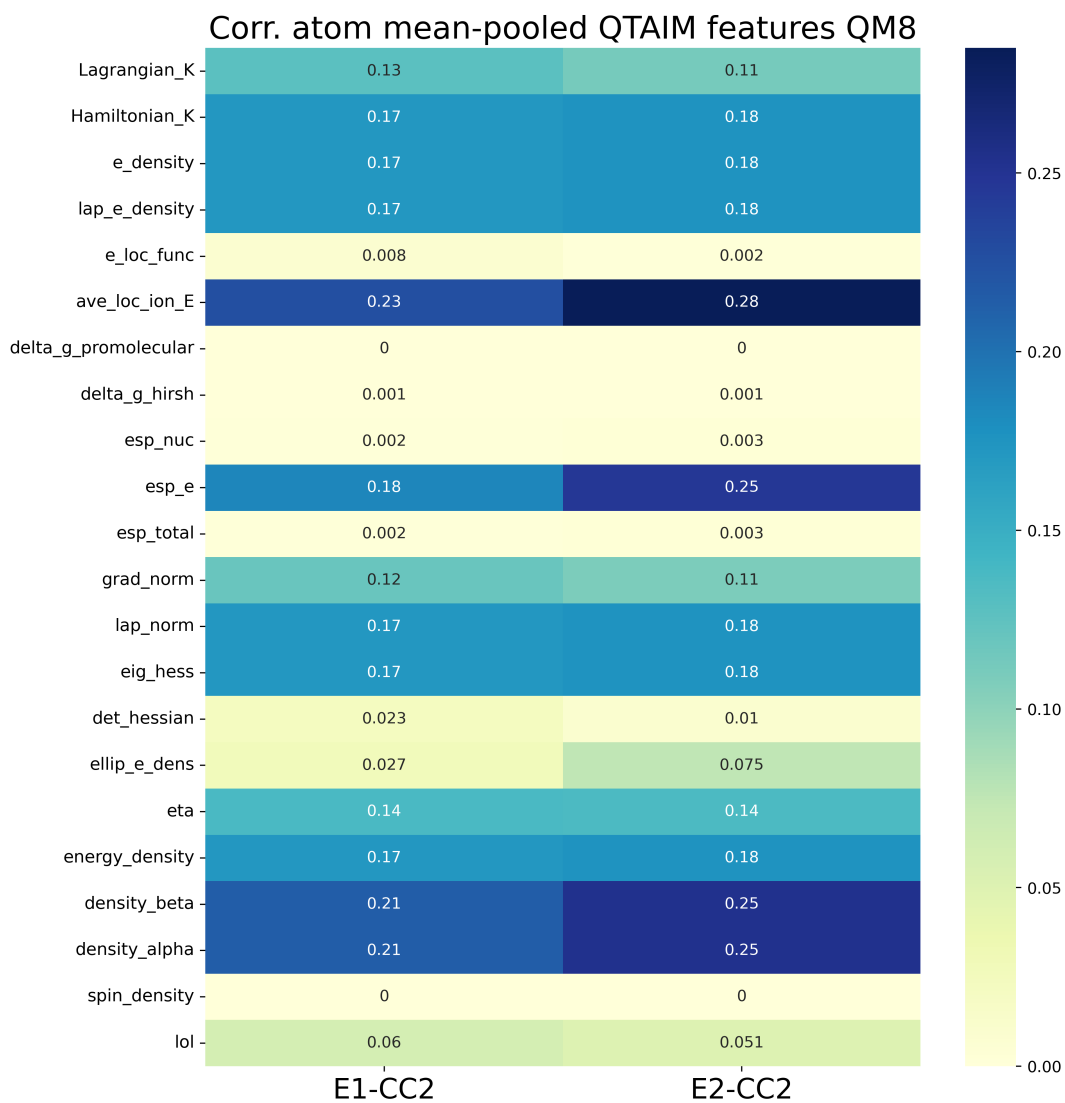

Figure S42: Correlation of NCP values with QM8 target values



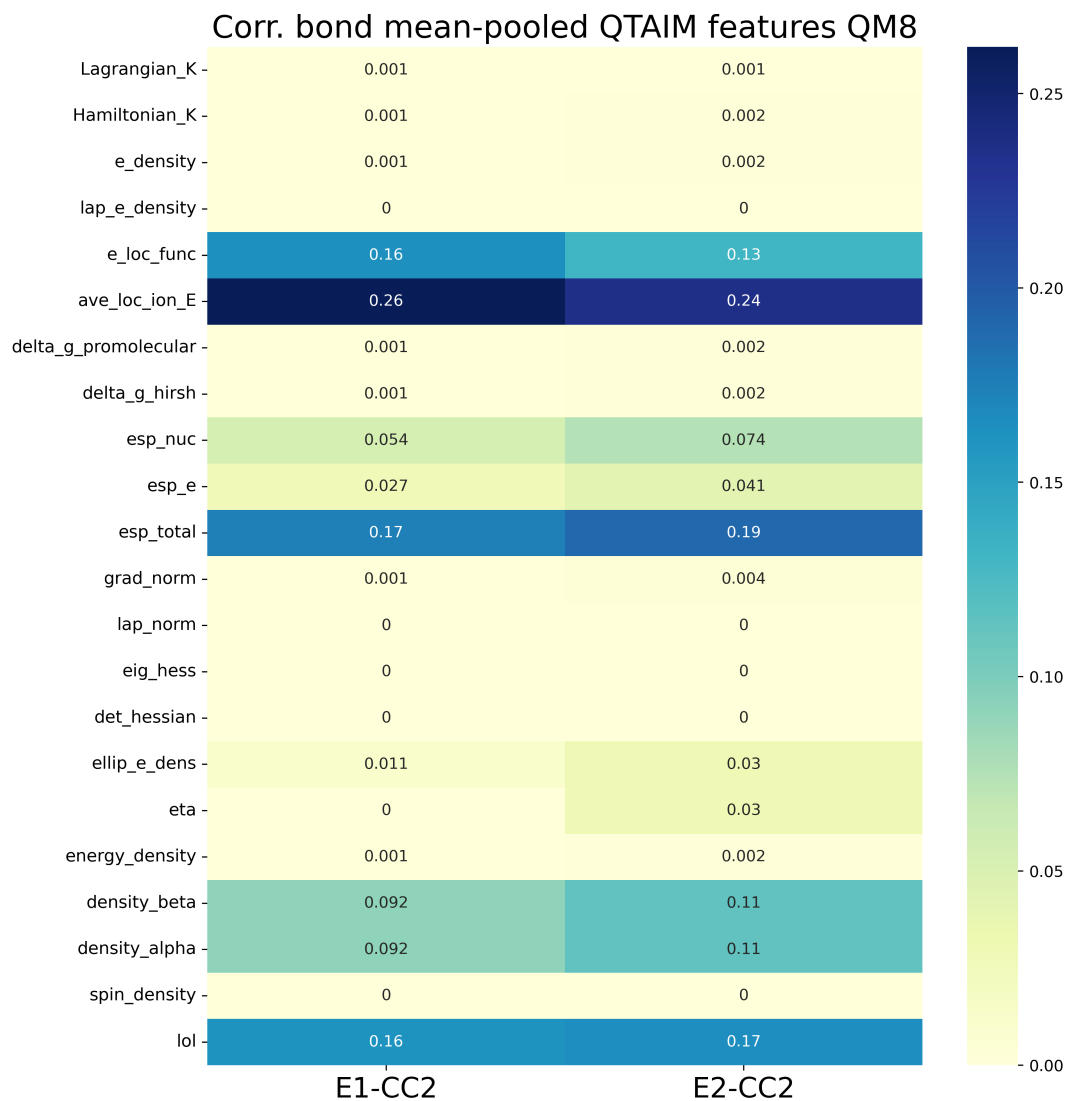

**Figure S43:** Correlation of BCP values with QM8 target values

# QM9

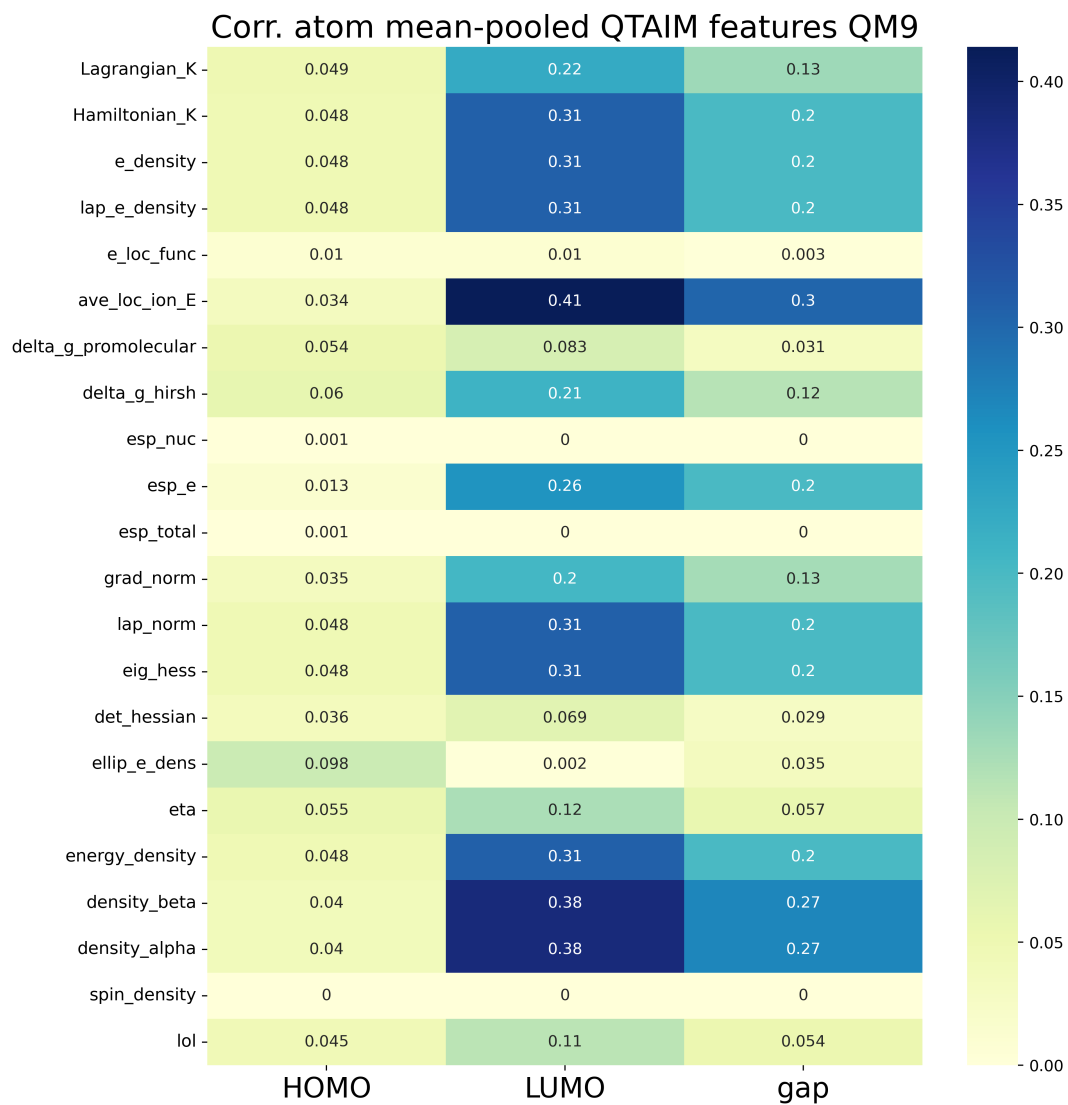

Figure S44: Correlation of NCP values with QM9 target values

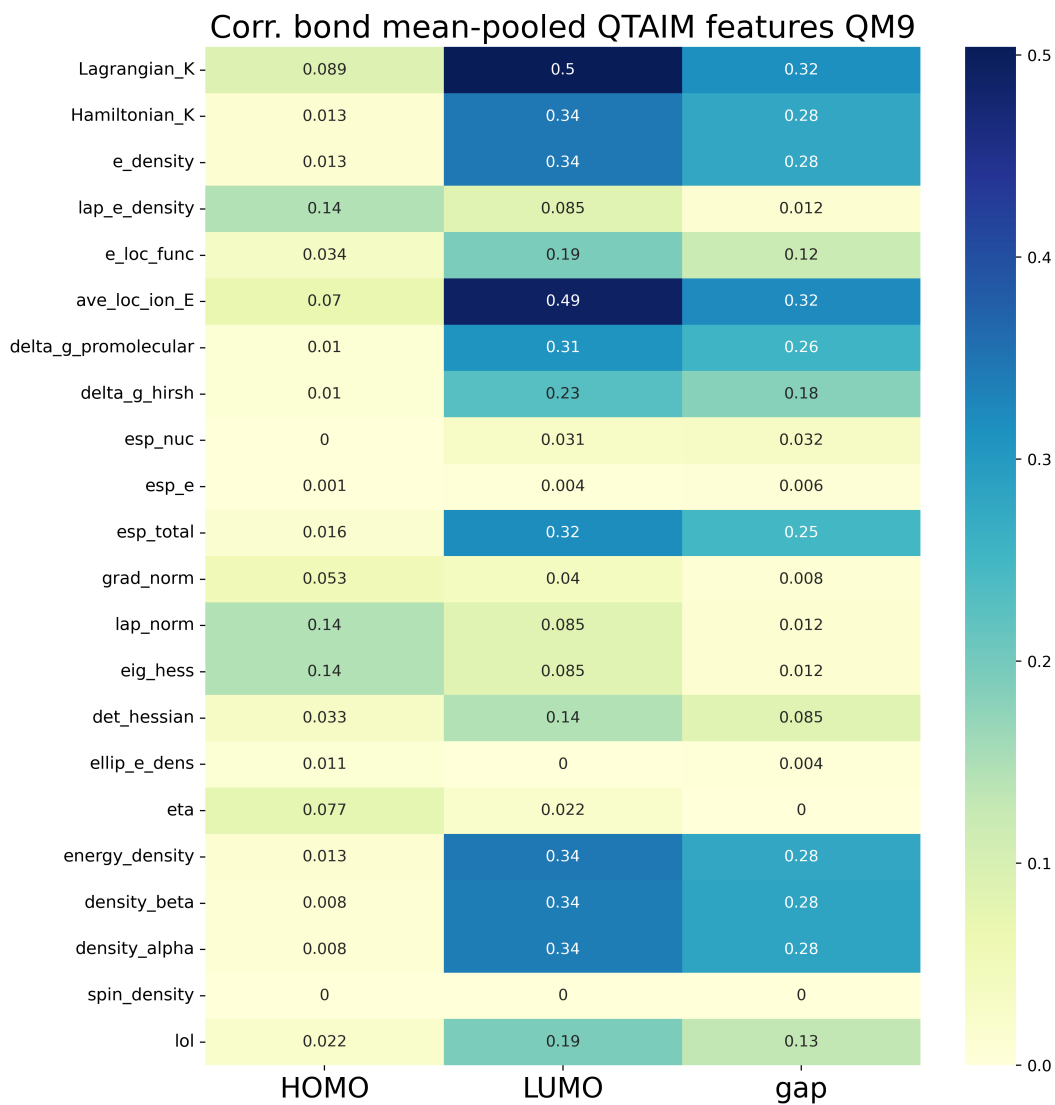

**Figure S45:** Correlation of BCP values with QM9 target values

# LIBE

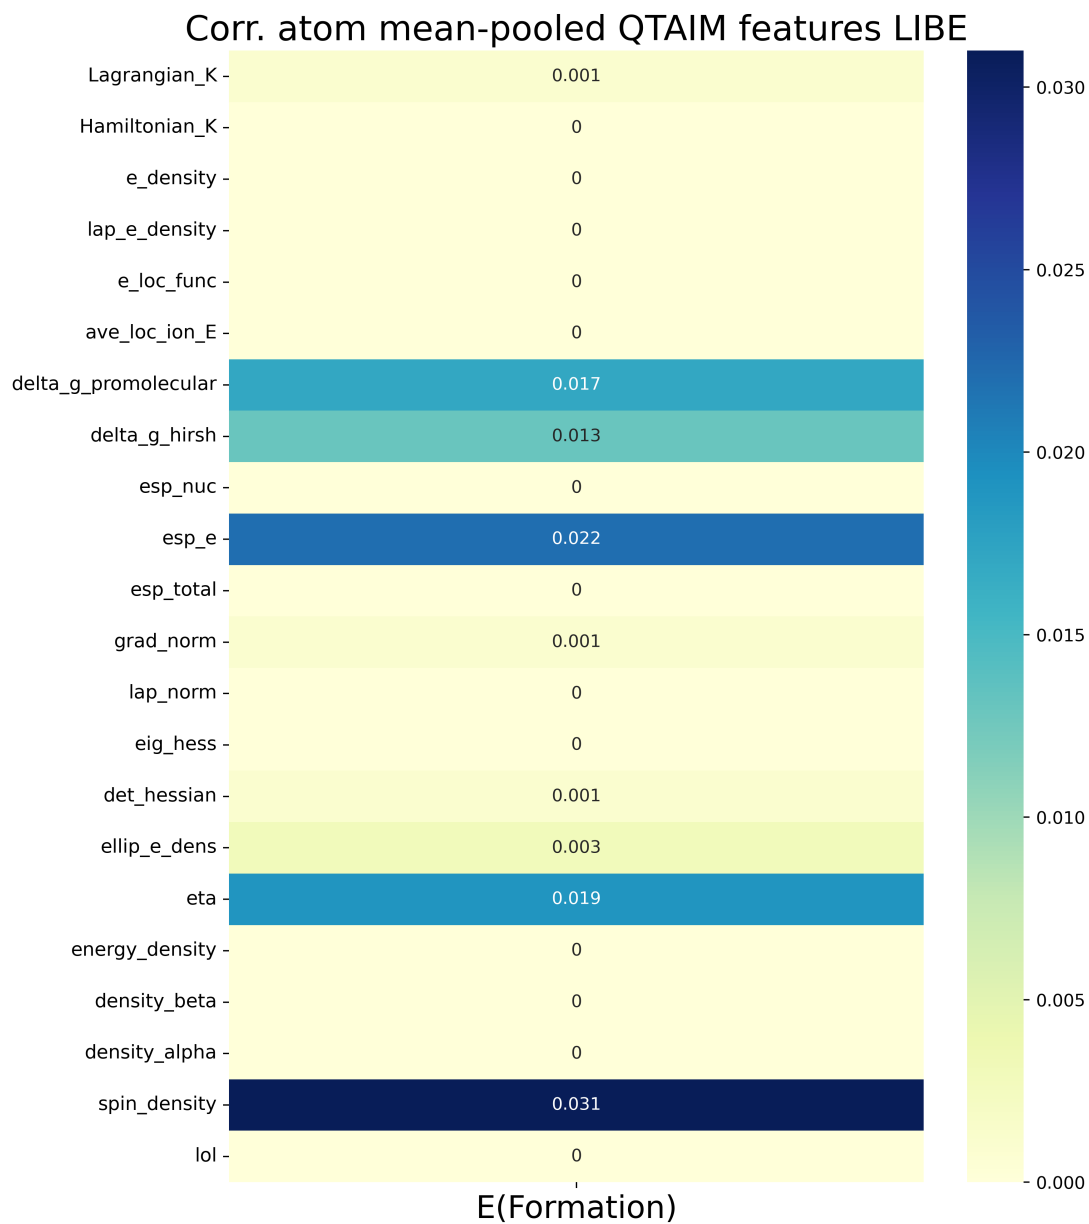

**Figure S46:** Correlation of NCP values with LIBE target values

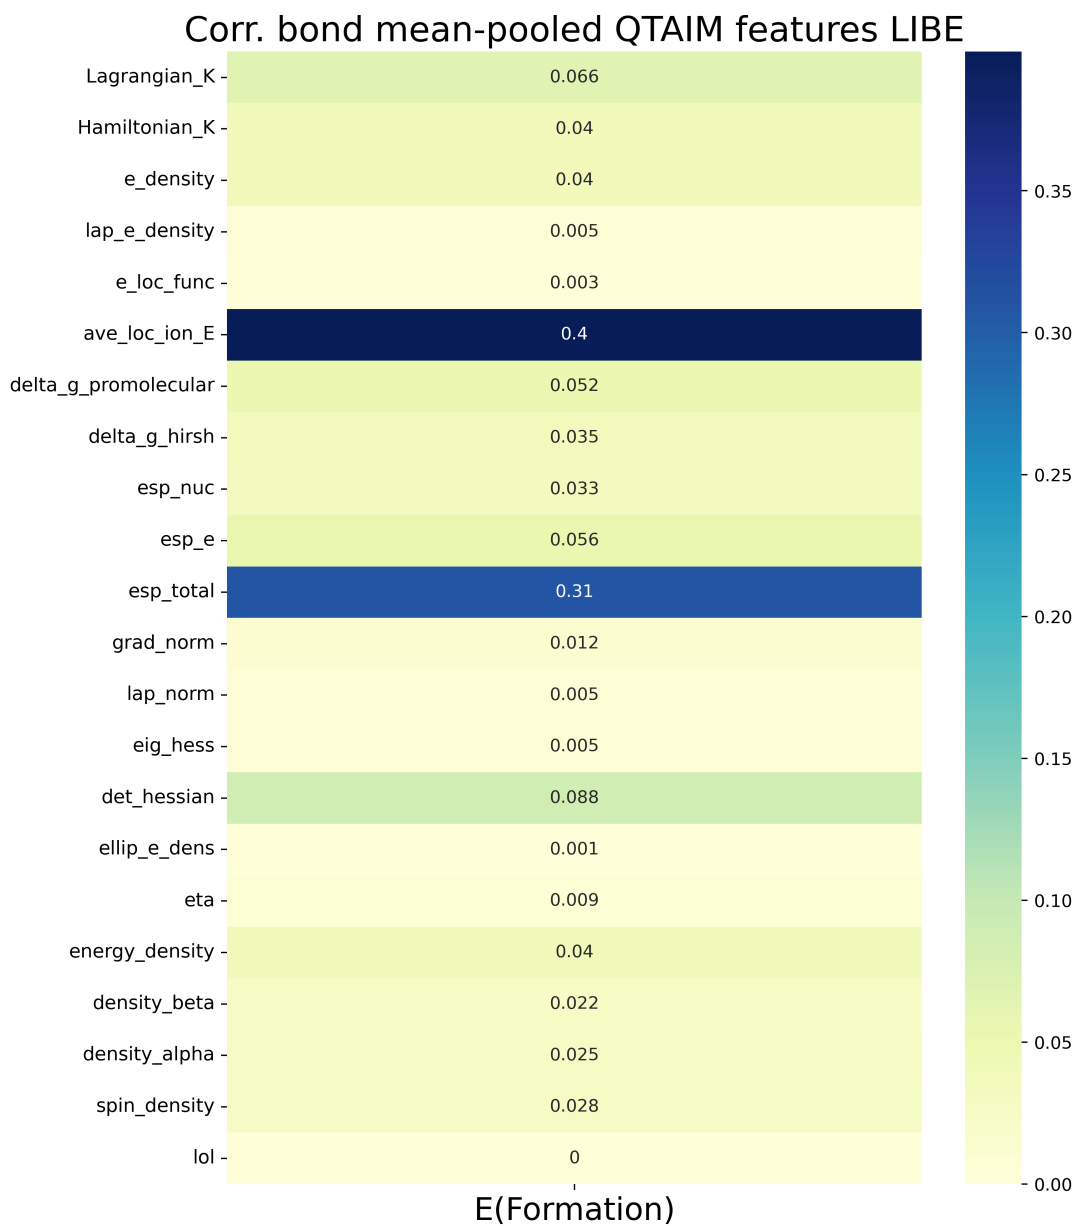

**Figure S47:** Correlation of BCP values with LIBE target values

# Scatterplots of competing models

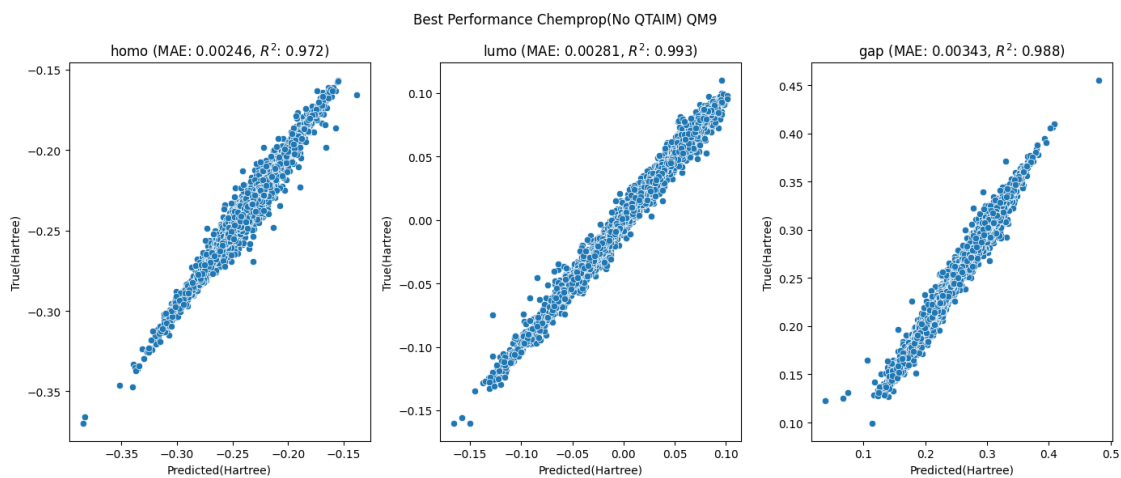

Figure S48: Parity Plot QM9 chemprop no QTAIM

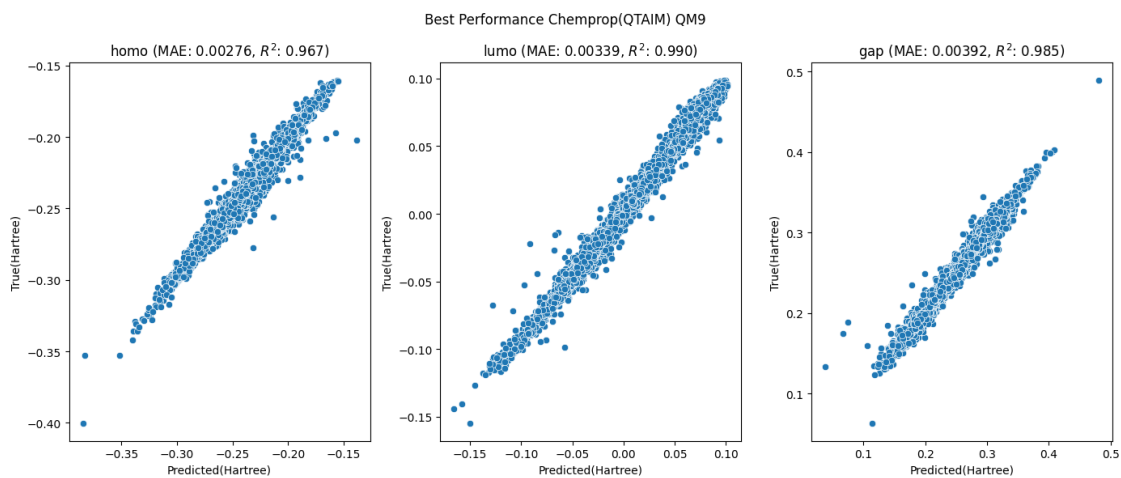

Figure S49: Parity Plot QM9 chemprop QTAIM

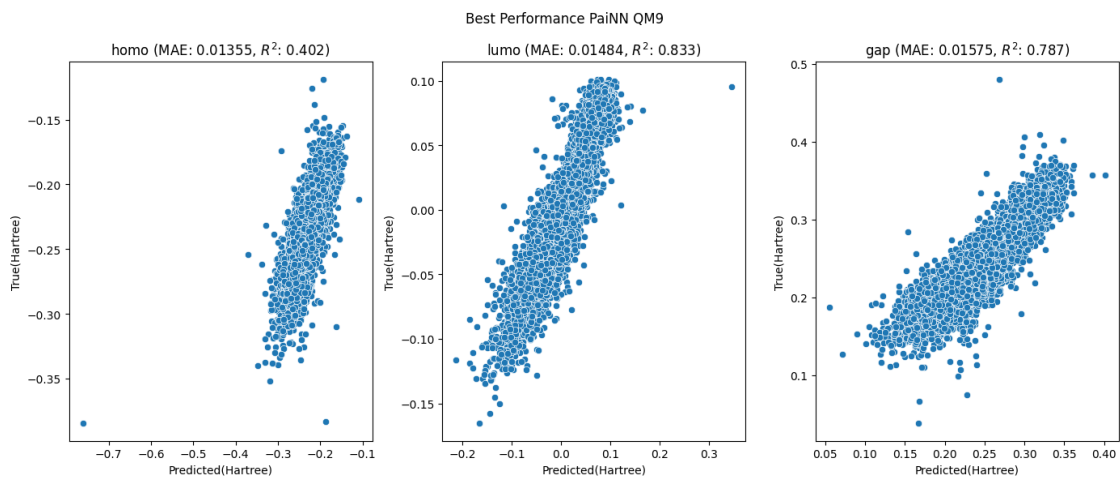

Figure S50: Parity Plot QM9 painn

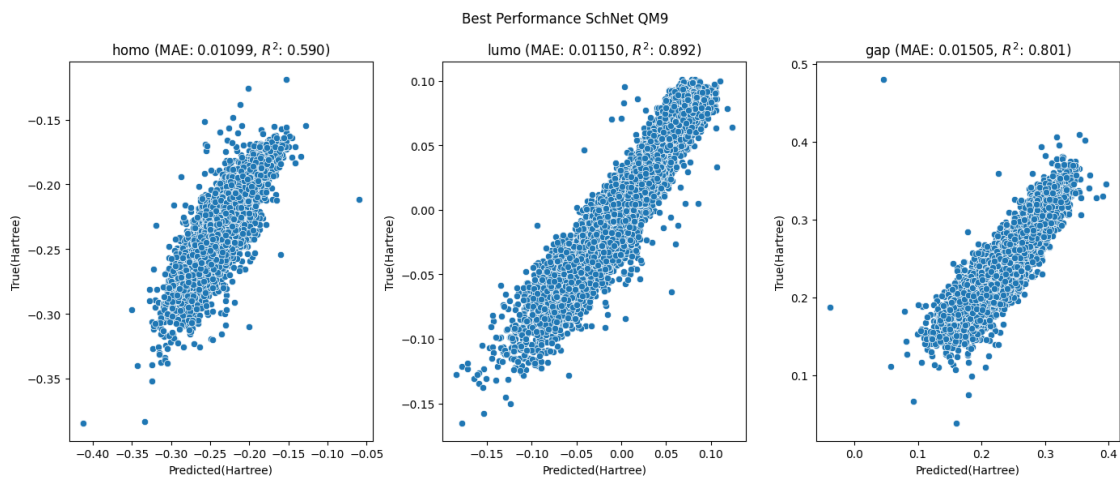

Figure S51: Parity Plot QM9 Schnet

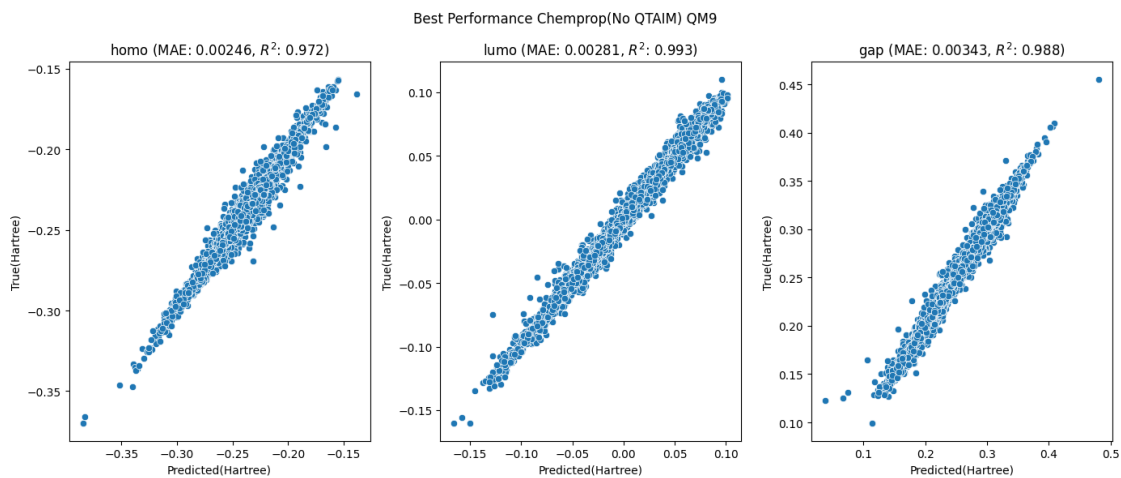

**Figure S52:** Parity Plot QM8 chemprop no QTAIM

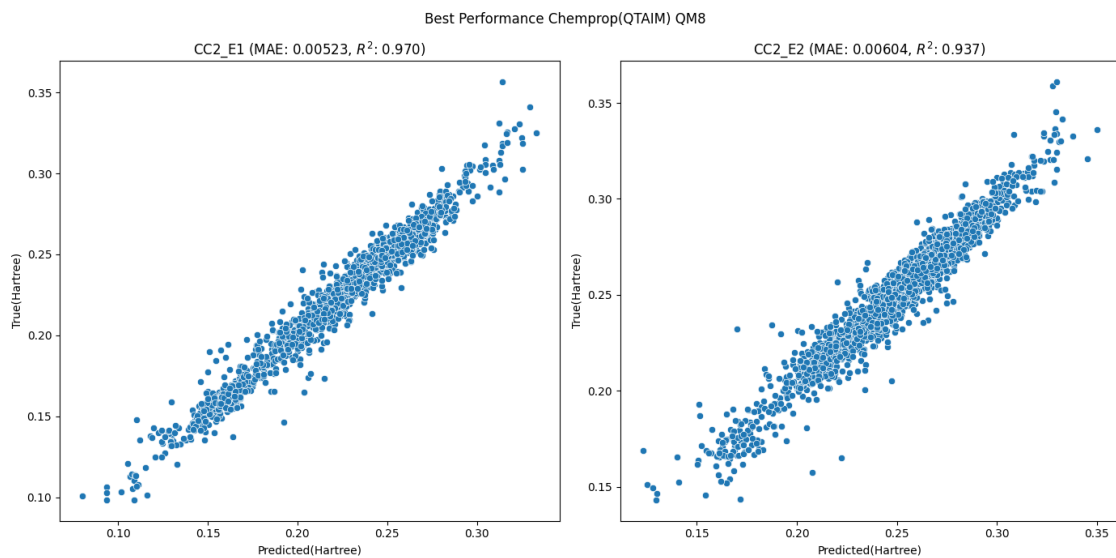

**Figure S53:** Parity Plot QM8 chemprop QTAIM



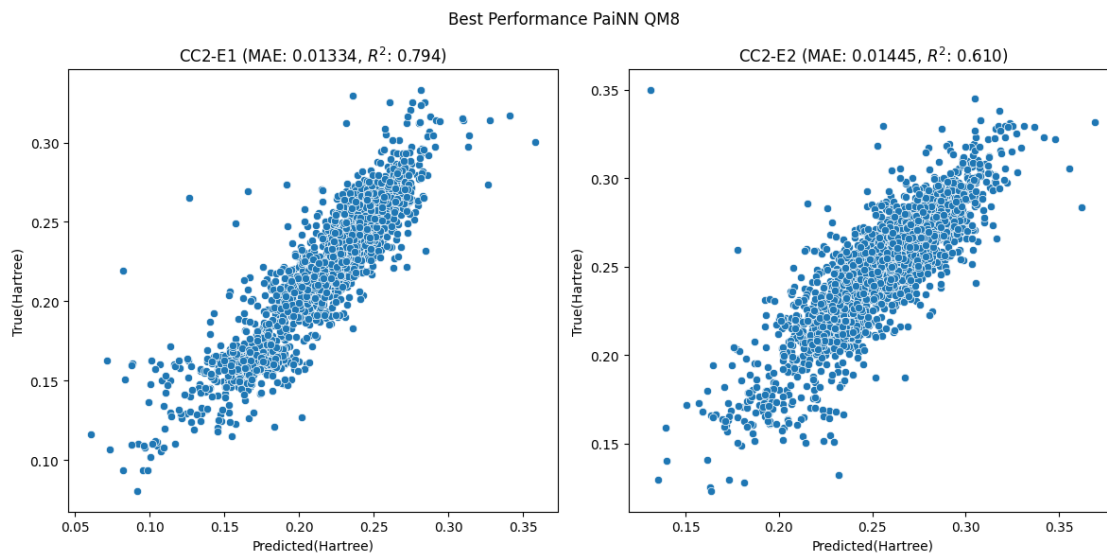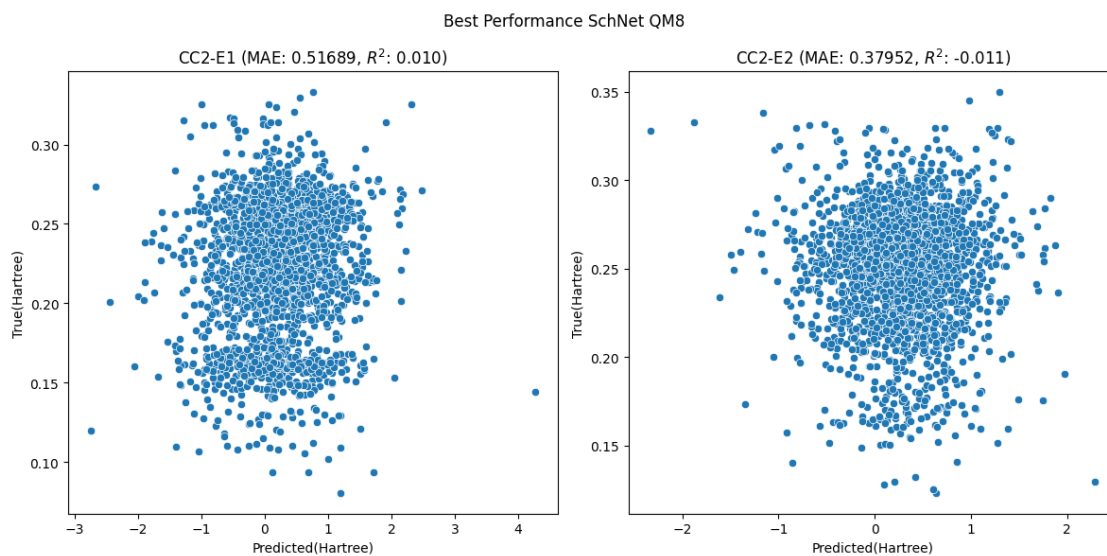

## References

- (1) Heid, E.; Greenman, K. P.; Chung, Y.; Li, S.-C.; Graff, D. E.; Vermeire, F. H.; Wu, H.; Green, W. H.; McGill, C. J. Chemprop: A Machine Learning Package for Chemical Property Prediction. *Journal of Chemical Information and Modeling* **2023**, *64*, 9–17.

- (2) Schütt, K.; Unke, O.; Gastegger, M. Equivariant message passing for the prediction of tensorial properties and molecular spectra. Proceedings of the 38th International Conference on Machine Learning. 2021; pp 9377–9388.
- (3) Schütt, K. T.; Arbabzadah, F.; Chmiela, S.; Müller, K. R.; Tkatchenko, A. Quantum-chemical insights from deep tensor neural networks. *Nature Communications* **2017**, *8*.
- (4) Biewald, L. Experiment Tracking with Weights and Biases. 2020; <https://www.wandb.com/>, Software available from wandb.com.

# TOC Graphic

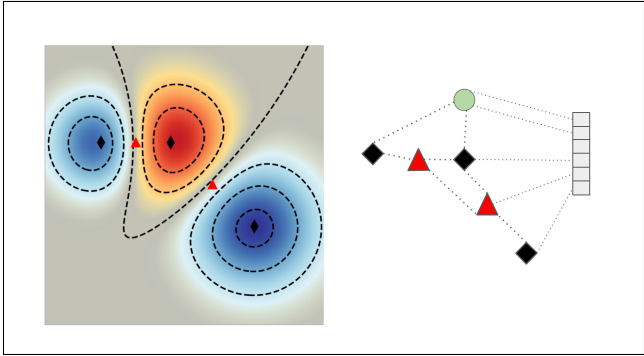

Supplement: d4dd00057a1.pdf [file d4dd00057a1.pdf]
